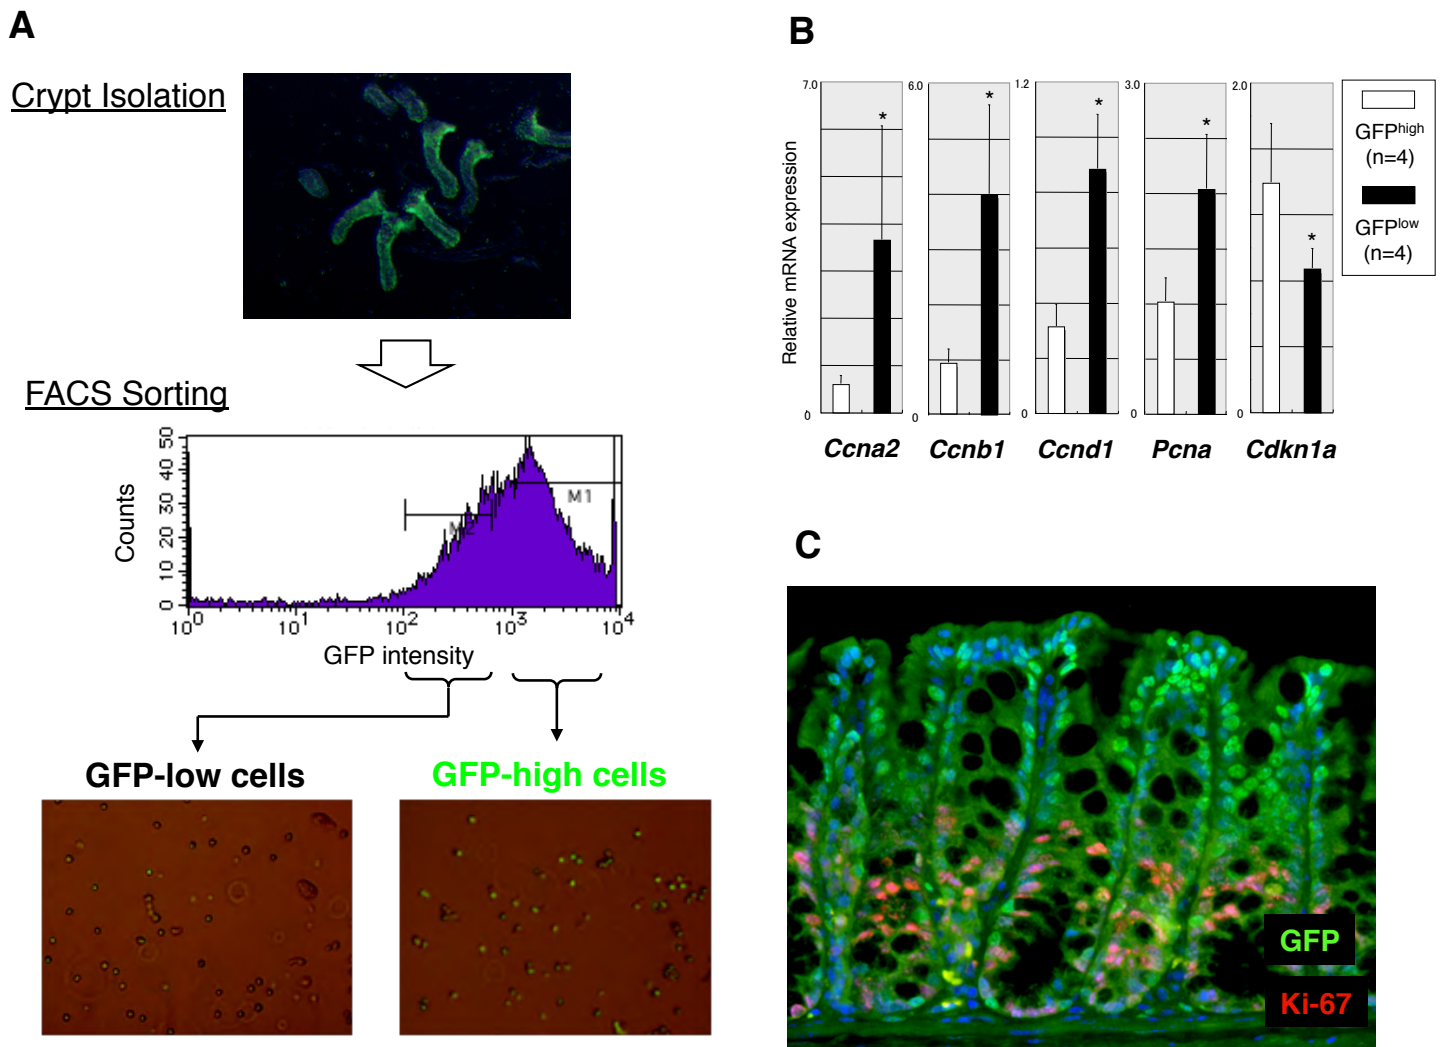

**Fig. S1. Separation of proliferating cells from non-proliferative cells in the colon of histone H2B-GFP inducible mice.** (A) Schematic of separation of proliferating cells from non-proliferating cells in the colonic crypts. GFP<sup>high</sup> and GFP<sup>low</sup> cells were sorted from the isolated crypts by FACS. (B) Expression of cell cycle-related genes assessed by quantitative real-time PCR. The expressions of *Ccna2*, *Ccnb1*, *Ccnd1* and *PcnA* were significantly higher in GFP<sup>low</sup> proliferating cells than in GFP<sup>high</sup> non-proliferating cells, whereas the expression of *Cdkn1a* (*p21*) was significantly upregulated in GFP<sup>high</sup> cells. Data represent means  $\pm$  s.d.; \* $P < 0.05$ , by Mann-Whitney *U*-test. (C) Immunostaining for GFP (green) and Ki-67 (red) on a colon section of an H2B-GFP inducible mouse. GFP<sup>low</sup> cells contain a higher number of Ki-67-positive cells than do GFP<sup>high</sup> cells.

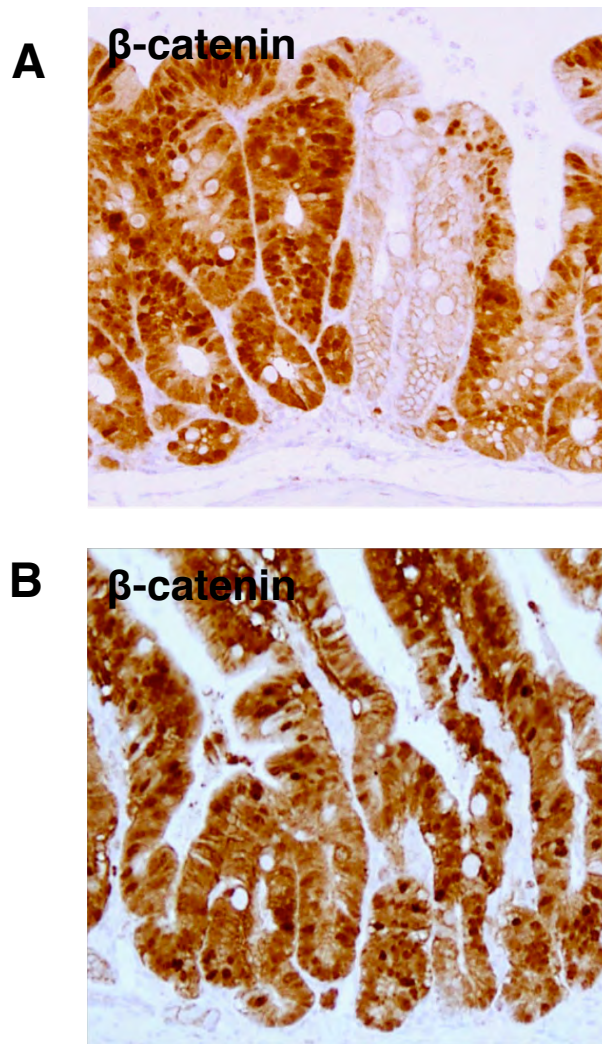

**Fig. S2. Forced expression of  $\beta$ -catenin leads to crypt fission in both colon and small intestine.** (A) Immunostaining for  $\beta$ -catenin on colonic section of a doxycycline-treated chimeric mouse. Crypt fission/branching phenotype is detectable only in  $\beta$ -catenin-induced crypts but not in host embryo-derived crypts. (B) Immunostaining for  $\beta$ -catenin in the small intestine of a  $\beta$ -catenin-induced mouse.  $\beta$ -Catenin induction causes frequent crypt fission/branching also in crypts of small intestine.

**A**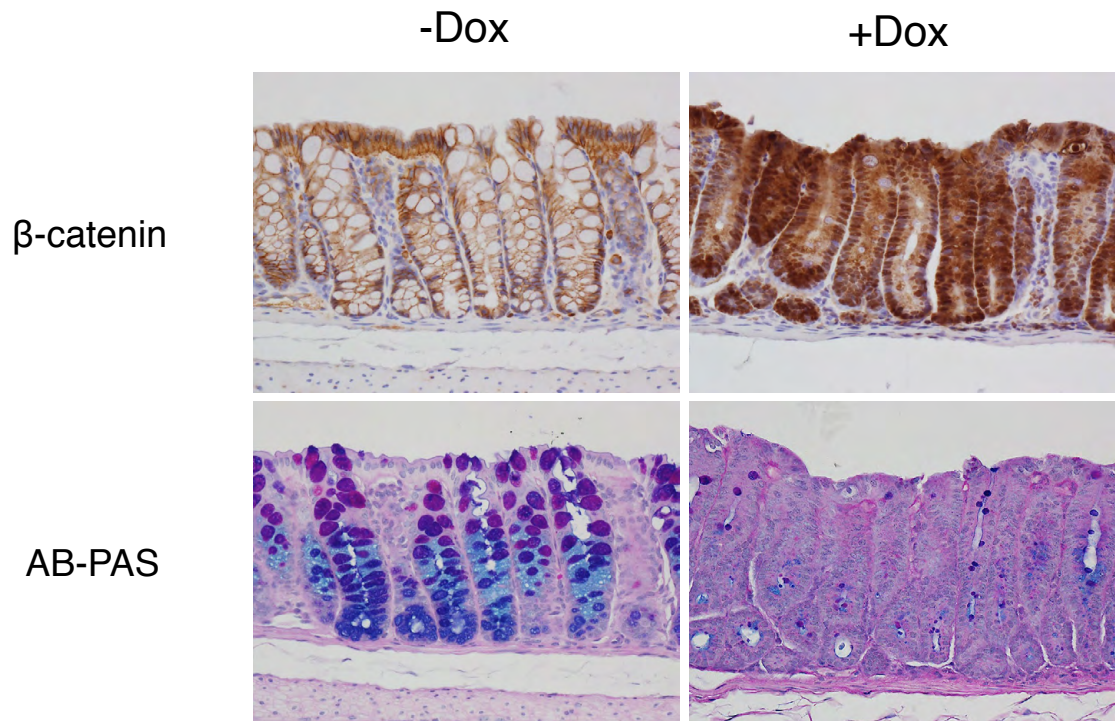**B**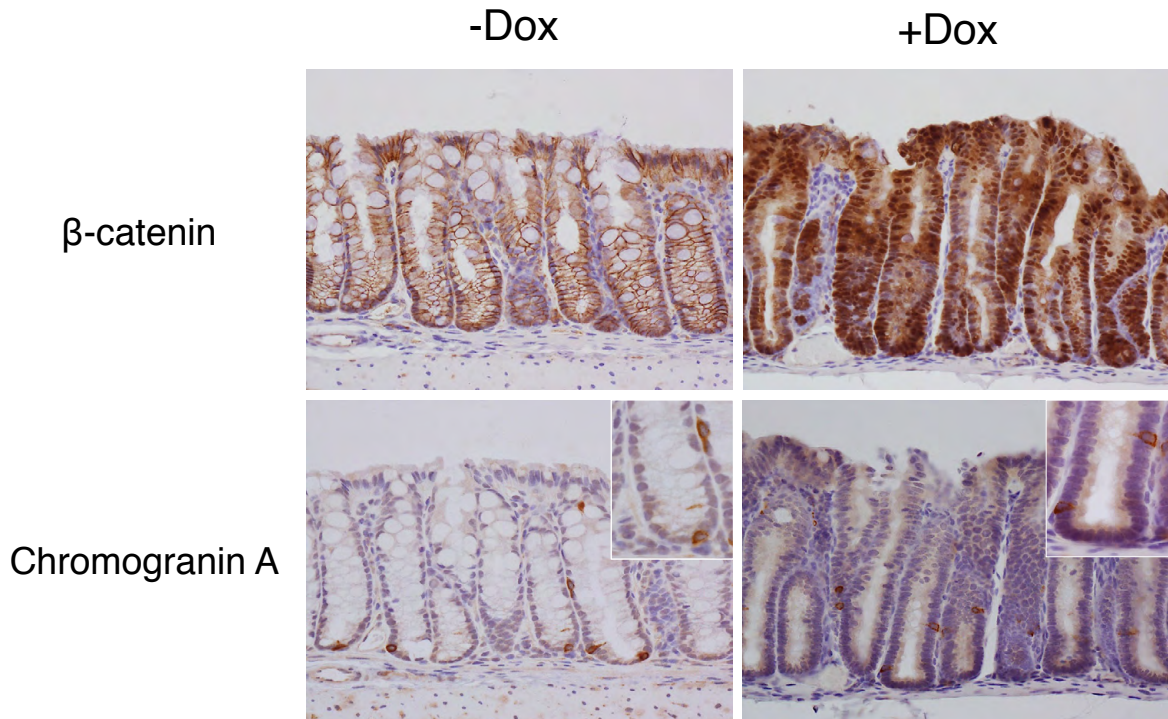

**Fig. S3. Effect of  $\beta$ -catenin induction on differentiation of colonic epithelial cells.** (A) Immunostaining for  $\beta$ -catenin and Alcian-Blue-periodic acid-Schiff (AB-PAS) staining on serial colonic sections of untreated and doxycycline-treated  $\beta$ -catenin inducible mice. Mucin-producing goblet cells were markedly reduced in  $\beta$ -catenin-induced colon. (B) Immunostaining for  $\beta$ -catenin and chromogranin A on serial colonic sections of untreated and doxycycline-treated  $\beta$ -catenin inducible mice. Chromogranin A-positive enteroendocrine cells were found in both  $\beta$ -catenin induced and non-induced crypts. Insets show higher magnification views of colonic crypts.

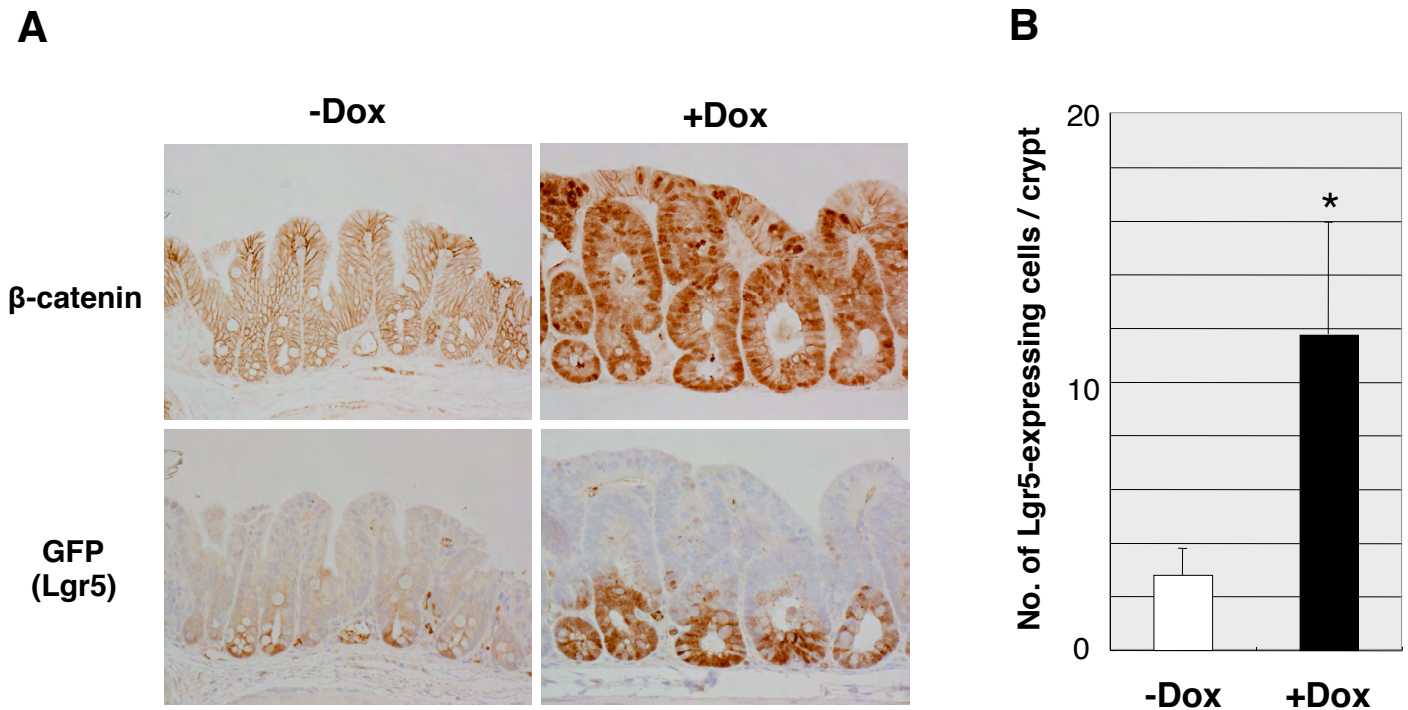

**Fig. S4. Forced expression of  $\beta$ -catenin increases the number of *Lgr5*-expressing cells in colonic crypts.** (A) Immunostaining for  $\beta$ -catenin and GFP on colonic sections of  $\beta$ -catenin-induced mice with *Lgr5-GFP* knock-in allele. GFP expression reveals an increased number of *Lgr5*-expressing cells at the lower part of colonic crypts in  $\beta$ -catenin-induced mice. Note that *Lgr5*-expressing cells were only observed at the lower part of the colonic crypts (lower right) whereas nuclear accumulation of  $\beta$ -catenin was observed in the entire crypt epithelium (upper right). (B) The number of *Lgr5*-expressing cells per crypt in  $\beta$ -catenin-induced colon. The number of *Lgr5*-expressing cells significantly increases following  $\beta$ -catenin induction. Data represent mean  $\pm$  s.d.; \* $P < 0.0001$ , by Student's *t*-test.

**A**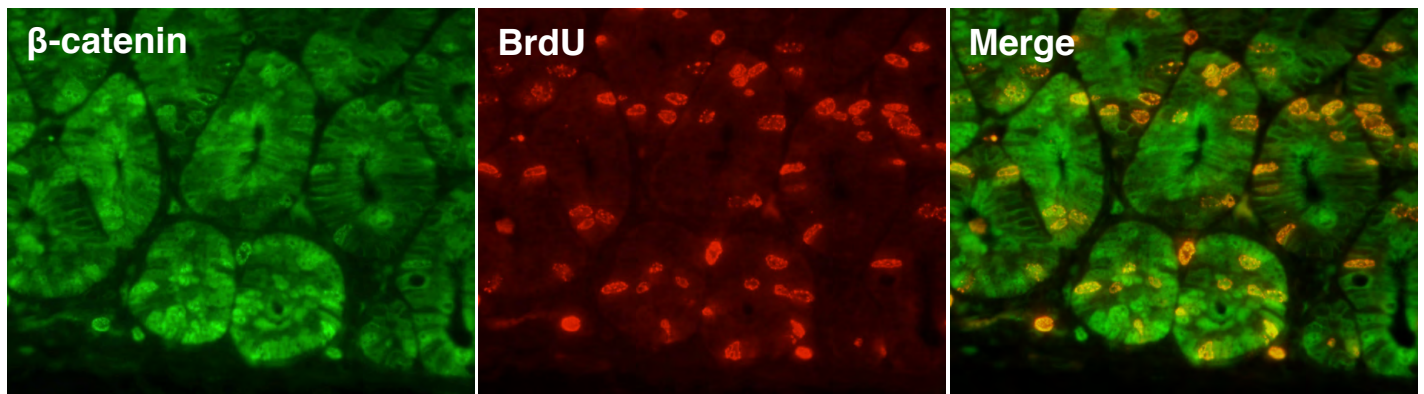**B**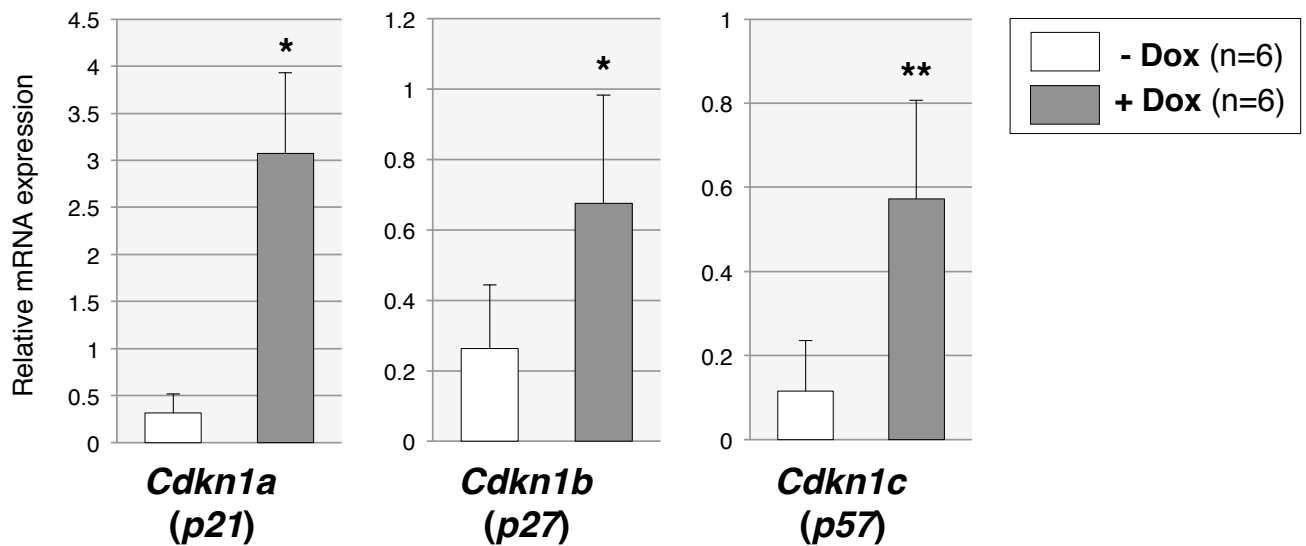

**Fig. S5. Colonic cells with strong nuclear  $\beta$ -catenin expression do not actively divide.** (A) Double immunostaining for  $\beta$ -catenin (green) and BrdU (red) on colonic section of a  $\beta$ -catenin-induced mouse given BrdU injection 2 hours before sacrifice. Colonic cells with strong nuclear  $\beta$ -catenin expression show less frequent BrdU incorporation. (B) Expression of cell Cdk inhibitors assessed by qRT-PCR. The expression of Cdk inhibitors is significantly upregulated by  $\beta$ -catenin induction. Data represent mean  $\pm$  s.d.; \* $P$ <0.05, \*\* $P$ <0.01 by Mann–Whitney  $U$ -test.

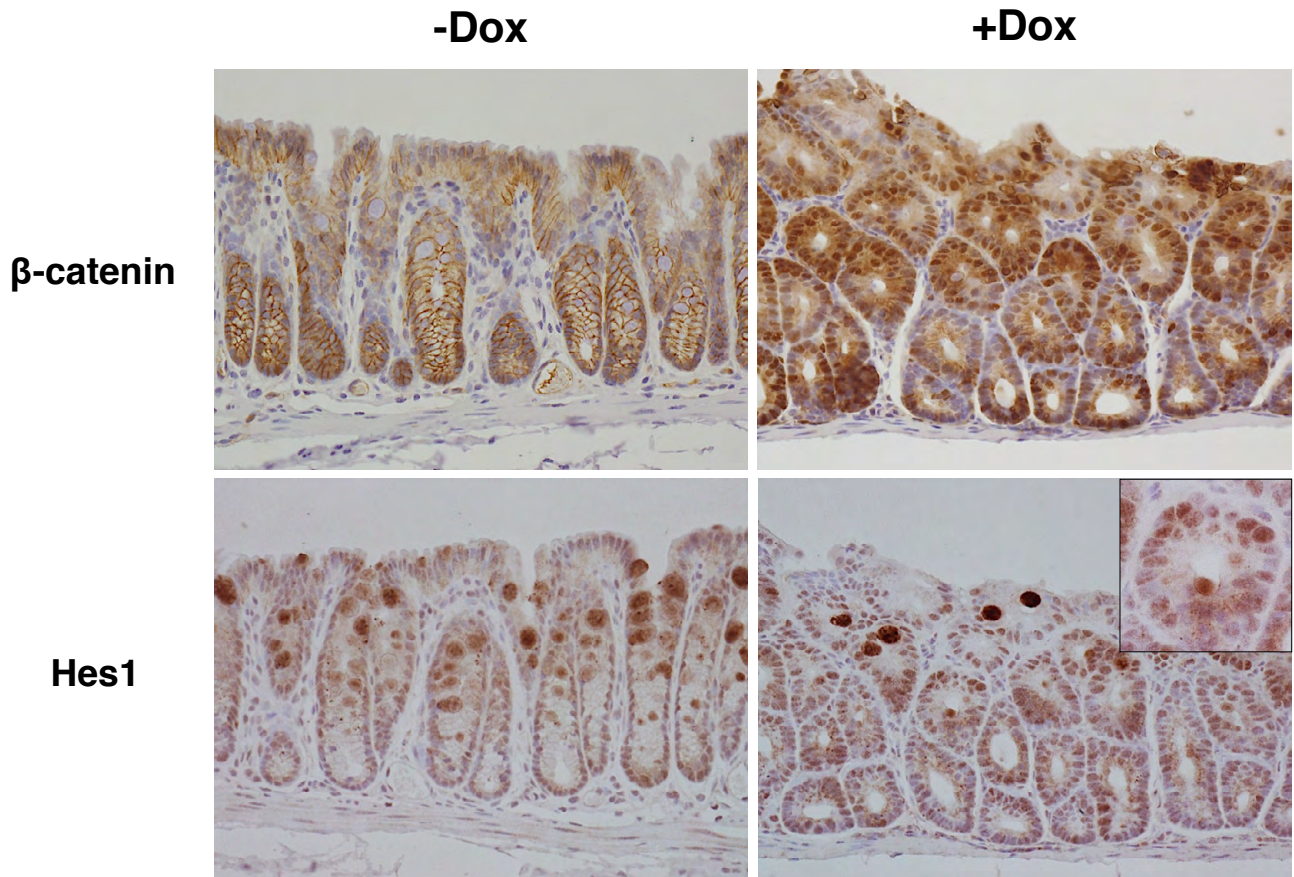

**Fig. S6. Forced expression of  $\beta$ -catenin increases Hes1 expression in colonic crypts.** Immunostaining for Hes1 on serial colonic sections of untreated and doxycycline-treated  $\beta$ -catenin-inducible mice. Strong nuclear expression of Hes1 is found in  $\beta$ -catenin-induced colonic crypts. Nuclear Hes1 can be observed throughout the crypt with  $\beta$ -catenin induction. Inset shows higher magnification views of  $\beta$ -catenin-induced crypts.

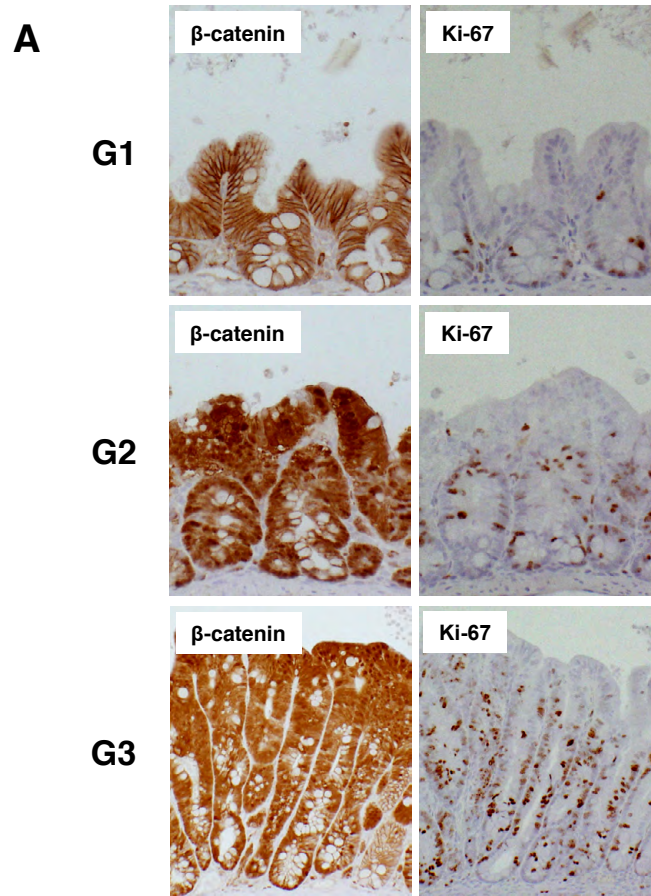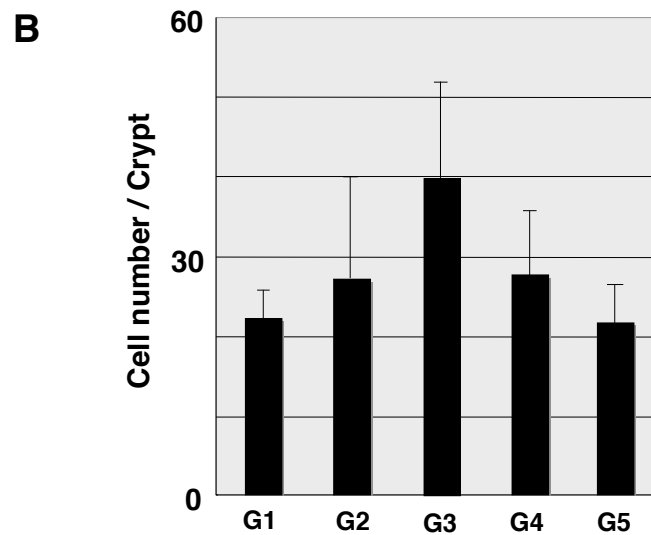

**Fig. S7. Notch inhibitor induces active proliferation in the slow-cycling  $\beta$ -catenin induced colon.** (A) Immunostaining for  $\beta$ -catenin and Ki-67 on colon sections. Treatment with a Notch inhibitor induces active cell proliferation of  $\beta$ -catenin-expressing cells. (B) The number of cells per crypt is significantly higher in G3 than other groups ( $P < 0.001$  for G1,  $P < 0.05$  for G2 and G4, and  $P < 0.0005$  for G5, respectively, by one-way ANOVA and Turkey's post hoc test), indicating elongation of the crypts. See Fig. 4 for description of protocols G1-G5.

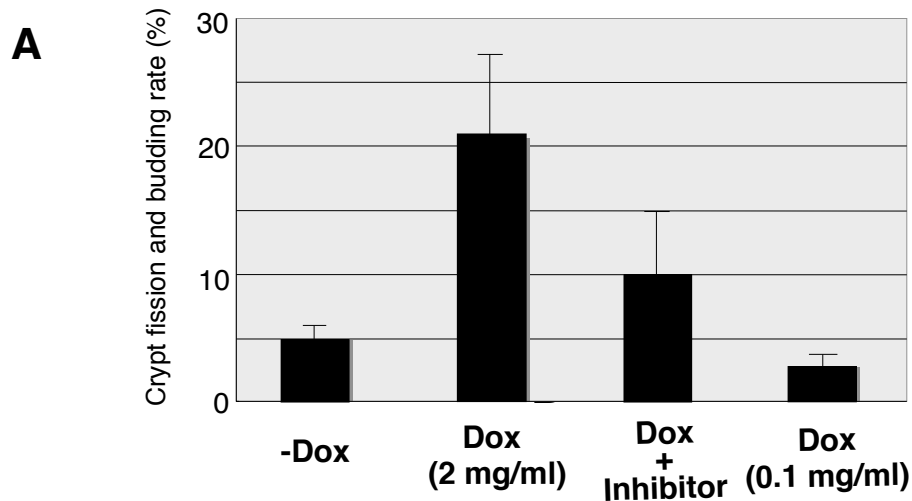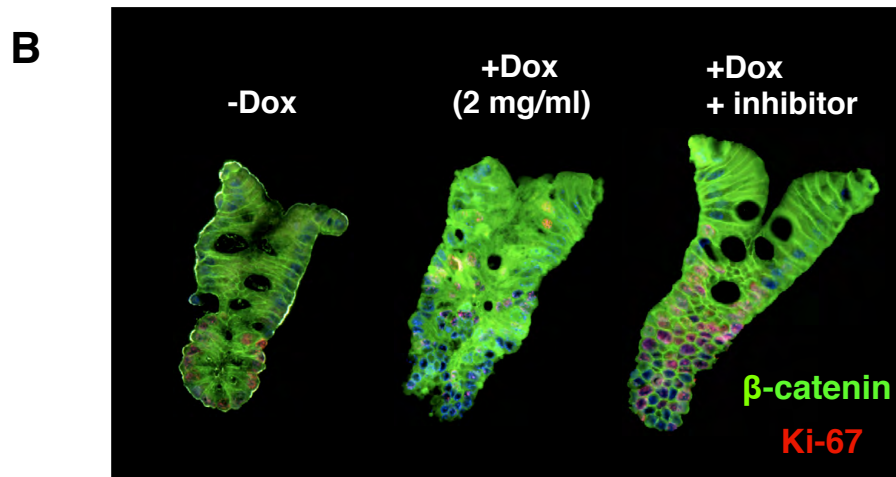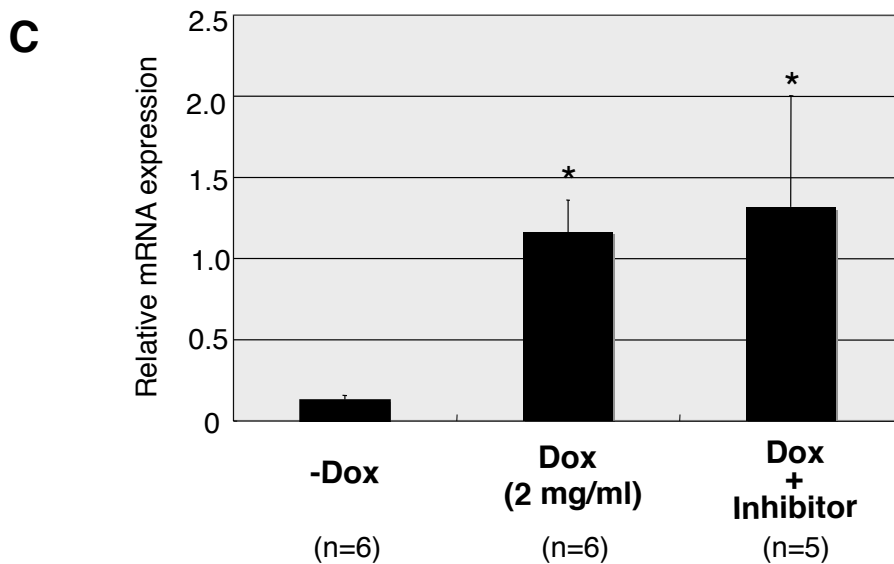

**Fig. S8. Notch inhibitor suppresses the *de novo* crypt formation in  $\beta$ -catenin induced colon.** (A) Crypt fission/budding rate of isolated crypts. The rate is significantly decreased at  $\beta$ -catenin-induced crypts with an inhibitor [ $P < 0.05$  compared with doxycyclin-treated mice (2 mg/ml), by Kruskal-Wallis test followed by Steel-Dwass test]. When mice are treated with lower concentration of doxycycline (0.1 mg/ml), the crypt fission/budding rate does not increase. (B) Double immunostaining for  $\beta$ -catenin (green) and Ki-67 (red) of isolated crypts. Treatment with a Notch inhibitor decreases nuclear  $\beta$ -catenin expression in  $\beta$ -catenin-induced crypt, which is accompanied by increased Ki-67 staining. (C) Quantitative real-time PCR for the gene encoding  $\beta$ -catenin. Notch inhibitor does not change  $\beta$ -catenin expression at the level of mRNA transcription in doxycycline-treated mice ( $P = 0.98$ ). Data represent mean  $\pm$  s.d.; \* $P < 0.05$  compared with non-treated mice, by Kruskal-Wallis test and post-hoc Steel-Dwass test.



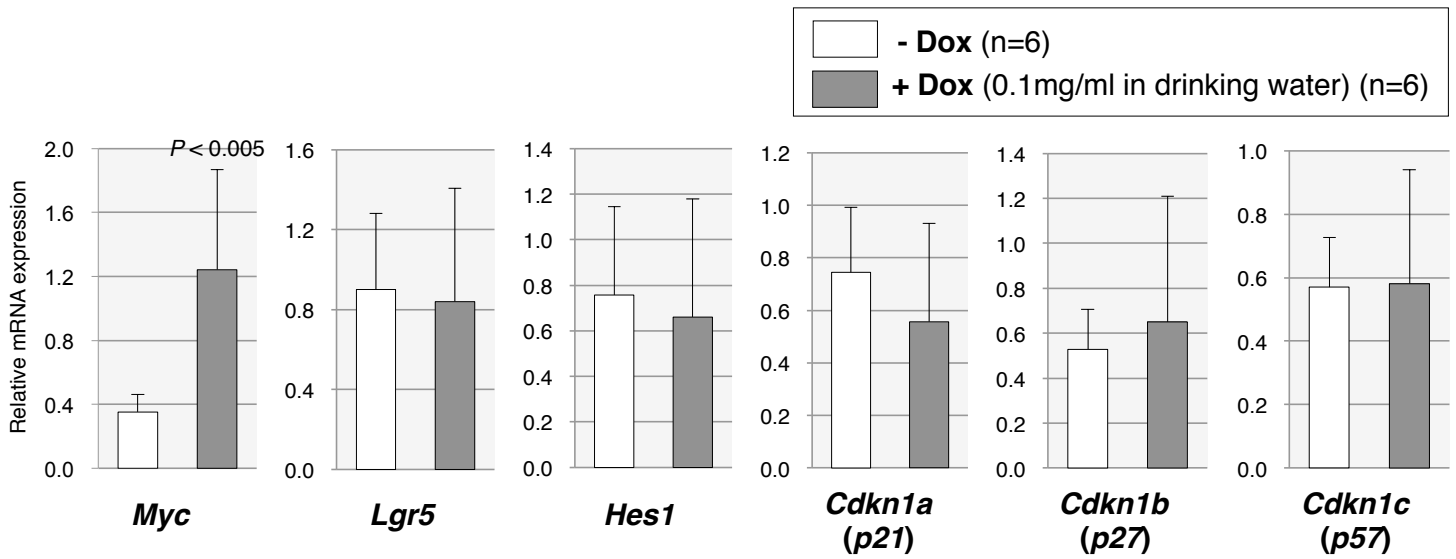

**Fig. S9. Lower level of  $\beta$ -catenin induction leads to different patterns of transcriptional activation.** qRT-PCR analyses of the Wnt target *Myc*, the ISC marker *Lgr5*, the Notch target *Hes1* and the Cdk inhibitors *Cdkn1a (p21)*, *Cdkn1b (p27)* and *Cdkn1c (p57)* in colonic crypts with lower level of  $\beta$ -catenin induction.  $\beta$ -Catenin-inducible mice were treated with 0.1 mg/ml doxycycline in drinking water for 5 days. Although *Myc* is significantly upregulated ( $P < 0.005$ , by Mann-Whitney *U*-test), expression of *Lgr5*, *Hes1* and Cdk inhibitors is not changed. See also Fig. 2B for comparison with the transcription in colonic crypts with higher level of  $\beta$ -catenin induction. Data represent mean  $\pm$  s.d.

Table S1. Upregulated genes in the colonic crypts with  $\beta$ -catenin induction for 24 hours and 5 days.

| Probe ID | Gene symbol | Gene name                                                       | Change in expression (fold) |        |
|----------|-------------|-----------------------------------------------------------------|-----------------------------|--------|
|          |             |                                                                 | 24 hours                    | 5 days |
| 14187    | BE136769    | expressed sequence BE136769                                     | 1.0                         | 112.8  |
| 14191    | Sox4 *      | SRY-box containing gene 4                                       | 10.2                        | 31.3   |
| 14472    | H2-BI       | histocompatibility 2, blastocyst                                | 0.7                         | 29.0   |
| 14476    | Kcnk13      | potassium channel, subfamily K, member 13                       | 2.0                         | 21.7   |
| 14414    | Brwd3       | bromodomain and WD repeat domain containing 3                   | 7.8                         | 19.1   |
| 14363    | Neto2 *     | neuropilin (NRP) and tolloid (TLL)-like 2                       | 2.8                         | 18.3   |
| 14229    | Sp5         | trans-acting transcription factor 5                             | 3.8                         | 15.2   |
| 14422    | LOC625068   | Similar to vomeronasal 2, receptor, 2                           | 2.4                         | 13.9   |
| 14187    | Pnkd        | paroxysmal nonkinesinogenic dyskinesia                          | 4.5                         | 13.8   |
| 14223    | Ascl2 *     | achaete-scute complex homolog-like 2 (Drosophila)               | 2.8                         | 13.6   |
| 14242    | Susd4       | sushi domain containing 4                                       | 10.1                        | 12.2   |
| 14447    | 4930550L11  | RIKEN cDNA 4930550L11 gene                                      | 2.9                         | 11.9   |
| 14418    | ---         | Transcribed locus                                               | 4.7                         | 10.5   |
| 14488    | Rpp25       | ribonuclease P 25 subunit (human)                               | 7.6                         | 9.5    |
| 14188    | Foxd1       | forkhead box D1                                                 | 3.4                         | 9.4    |
| 14317    | 2810404F17  | RIKEN cDNA 2810404F17 gene                                      | 0.9                         | 8.5    |
| 14406    | ---         | ---                                                             | 13.0                        | 8.4    |
| 14374    | Trim12      | tripartite motif protein 12                                     | 16.6                        | 8.4    |
| 14513    | Mtap        | methylthioadenosine phosphorylase                               | 4.6                         | 8.3    |
| 14555    | C630043F03  | RIKEN cDNA C630043F03 gene                                      | 5.2                         | 8.1    |
| 14454    | Auts2       | Autism susceptibility candidate 2                               | 8.8                         | 7.8    |
| 14361    | Scn2b       | sodium channel, voltage-gated, type II, beta                    | 1.9                         | 7.3    |
| 14251    | Gngt1 *     | guanine nucleotide binding protein (G protein), gamma transd    | 1.8                         | 7.3    |
| 14178    | Pla2g5      | phospholipase A2, group V                                       | 1.6                         | 7.2    |
| 14447    | Diap2       | Diaphanous homolog 2 (Drosophila)                               | 10.7                        | 6.9    |
| 14482    | Hmox1       | heme oxygenase (decycling) 1                                    | 2.7                         | 6.9    |
| 14320    | Ascl2 *     | achaete-scute complex homolog-like 2 (Drosophila)               | 3.2                         | 6.8    |
| 14422    | ---         | Adult male epididymis cDNA, RIKEN full-length enriched librar   | 7.8                         | 6.5    |
| 14400    | 6330549D2   | RIKEN cDNA 6330549D23 gene                                      | 3.0                         | 6.4    |
| 14441    | Pip5k2b     | Phosphatidylinositol-4-phosphate 5-kinase, type II, beta        | 8.6                         | 6.3    |
| 14417    | Slc11a2 *   | solute carrier family 11 (proton-coupled divalent metal ion tra | 24.6                        | 6.2    |
| 14489    | Tcl1b1      | T-cell leukemia/lymphoma 1B, 1                                  | 5.3                         | 6.2    |
| 14227    | Myt1        | myelin transcription factor 1                                   | 4.7                         | 6.2    |
| 14299    | 2610301F02  | RIKEN cDNA 2610301F02 gene                                      | 4.0                         | 6.0    |
| 14374    | Igfbp4 *    | insulin-like growth factor binding protein 4                    | 1.4                         | 5.9    |
| 14551    | Ckb         | creatine kinase, brain                                          | 0.9                         | 5.9    |
| 14411    | Clstn2      | calsyntenin 2                                                   | 3.4                         | 5.8    |
| 14455    | ---         | ---                                                             | 3.2                         | 5.7    |
| 14515    | Sgtb        | small glutamine-rich tetratricopeptide repeat (TPR)-containin   | 2.4                         | 5.6    |
| 14249    | Myc         | myelocytomatosis oncogene                                       | 2.5                         | 5.5    |
| 14356    | 2310008H0   | RIKEN cDNA 2310008H09 gene                                      | 4.2                         | 5.4    |
| 14517    | Nsdhl       | NAD(P) dependent steroid dehydrogenase-like                     | 1.8                         | 5.3    |
| 14217    | Rdh1        | retinol dehydrogenase 1 (all trans)                             | 0.8                         | 5.3    |
| 14344    | C030011O1   | RIKEN cDNA C030011O14 gene                                      | 3.5                         | 5.2    |
| 14385    | Vwa2        | von Willebrand factor A domain containing 2                     | 1.7                         | 5.0    |
| 14264    | Slc11a2 *   | solute carrier family 11 (proton-coupled divalent metal ion tra | 14.9                        | 4.9    |

|       |            |                                                                |     |     |
|-------|------------|----------------------------------------------------------------|-----|-----|
| 14356 | Ikbkg *    | inhibitor of kappaB kinase gamma                               | 7.6 | 4.8 |
| 14605 | Ascl2 *    | achaete-scute complex homolog-like 2 (Drosophila)              | 2.3 | 4.7 |
| 14237 | Igfbp4 *   | insulin-like growth factor binding protein 4                   | 0.9 | 4.6 |
| 14231 | Cfh        | complement component factor h                                  | 2.9 | 4.6 |
| 14550 | Tbc1d9     | TBC1 domain family, member 9                                   | 2.8 | 4.6 |
| 14486 | Arhgdig    | Rho GDP dissociation inhibitor (GDI) gamma                     | 1.4 | 4.5 |
| 14196 | Ier3       | immediate early response 3                                     | 2.3 | 4.5 |
| 14277 | Acta1      | actin, alpha 1, skeletal muscle                                | 3.3 | 4.4 |
| 14509 | Lgr5       | leucine rich repeat containing G protein coupled receptor 5    | 1.4 | 4.3 |
| 14228 | Hmga2 *    | high mobility group AT-hook 2                                  | 2.5 | 4.3 |
| 14341 | Serhl      | serine hydrolase-like                                          | 2.1 | 4.3 |
| 14438 | ---        | ---                                                            | 5.4 | 4.3 |
| 14207 | 5830411J07 | RIKEN cDNA 5830411J07 gene                                     | 2.7 | 4.1 |
| 14508 | Tnni1      | troponin I, skeletal, slow 1                                   | 6.0 | 4.1 |
| 14188 | Phlda1     | pleckstrin homology-like domain, family A, member 1            | 2.1 | 4.1 |
| 14474 | D7Wsu130e  | DNA segment, Chr 7, Wayne State University 130, expressed      | 1.2 | 4.0 |
| 14451 | C77631     | expressed sequence C77631                                      | 3.2 | 4.0 |
| 14383 | Cnn3 *     | Calponin 3, acidic                                             | 3.6 | 4.0 |
| 14213 | Axin2 *    | axin2                                                          | 1.5 | 4.0 |
| 14382 | Mid1       | midline 1                                                      | 7.2 | 3.9 |
| 14401 | Prkar1b    | protein kinase, cAMP dependent regulatory, type I beta         | 6.9 | 3.9 |
| 14178 | Gcat *     | glycine C-acetyltransferase (2-amino-3-ketobutyrate-coenzy     | 1.4 | 3.9 |
| 14341 | A530016O0  | RIKEN cDNA A530016O06 gene                                     | 4.5 | 3.9 |
| 14219 | Epha4      | Eph receptor A4                                                | 2.3 | 3.9 |
| 14490 | Myl7       | myosin, light polypeptide 7, regulatory                        | 2.2 | 3.8 |
| 14254 | Tgfr2      | transforming growth factor, beta receptor II                   | 3.5 | 3.8 |
| 14510 | Ftsj3      | FtsJ homolog 3 (E. coli)                                       | 2.0 | 3.8 |
| 14323 | 1700042B14 | RIKEN cDNA 1700042B14 gene                                     | 3.7 | 3.8 |
| 14432 | Mrps14     | mitochondrial ribosomal protein S14                            | 5.9 | 3.7 |
| 14536 | Fance *    | Fanconi anemia, complementation group E                        | 0.7 | 3.7 |
| 14374 | Igfbp4 *   | insulin-like growth factor binding protein 4                   | 1.3 | 3.7 |
| 14548 | Apcdd1     | adenomatosis polyposis coli down-regulated 1                   | 3.1 | 3.7 |
| 14248 | Trim34     | tripartite motif protein 34                                    | 6.7 | 3.7 |
| 14370 | C030011O1  | RIKEN cDNA C030011O14 gene                                     | 2.4 | 3.6 |
| 14520 | Zfp2 *     | zinc finger protein 2                                          | 1.9 | 3.6 |
| 14496 | Tubb2b *   | tubulin, beta 2b                                               | 0.9 | 3.5 |
| 14235 | Hsp110 *   | heat shock protein 110                                         | 2.5 | 3.5 |
| 14486 | Msx1       | homeo box, msh-like 1                                          | 1.9 | 3.5 |
| 14224 | Defcr4     | defensin related cryptdin 4                                    | 3.0 | 3.4 |
| 14205 | Rac3       | RAS-related C3 botulinum substrate 3                           | 1.5 | 3.4 |
| 14572 | ---        | 0 day neonate lung cDNA, RIKEN full-length enriched library, c | 1.6 | 3.4 |
| 14349 | Dmpk       | dystrophia myotonica-protein kinase                            | 1.2 | 3.4 |
| 14487 | Rbp1       | retinol binding protein 1, cellular                            | 0.9 | 3.4 |
| 14471 | Elavl1     | ELAV (embryonic lethal, abnormal vision, Drosophila)-like 1 (  | 1.6 | 3.4 |
| 14507 | Hmga2 *    | high mobility group AT-hook 2                                  | 1.6 | 3.4 |
| 14248 | Cep68 *    | centrosomal protein 68                                         | 1.7 | 3.4 |
| 14222 | Pfdn5      | prefoldin 5                                                    | 7.8 | 3.4 |
| 14524 | Fer1l3     | fer-1-like 3, myoferlin (C. elegans)                           | 4.2 | 3.4 |
| 14437 | H2-Aa      | Histocompatibility 2, class II antigen A, alpha                | 1.8 | 3.4 |
| 14365 | 2310008H0  | RIKEN cDNA 2310008H09 gene                                     | 1.5 | 3.3 |
| 14546 | Dctd       | dCMP deaminase                                                 | 1.4 | 3.3 |

|       |            |                                                                    |     |     |
|-------|------------|--------------------------------------------------------------------|-----|-----|
| 14234 | Mybbp1a *  | MYB binding protein (P160) 1a                                      | 1.6 | 3.3 |
| 14292 | Nap1l1 *   | nucleosome assembly protein 1-like 1                               | 1.1 | 3.3 |
| 14465 | ---        | ---                                                                | 3.5 | 3.3 |
| 14416 | Iars2      | isoleucine-tRNA synthetase 2, mitochondrial                        | 2.6 | 3.3 |
| 14210 | Gsta1      | glutathione S-transferase, alpha 1 (Ya)                            | 1.5 | 3.3 |
| 14515 | Ephb3      | Eph receptor B3                                                    | 1.0 | 3.3 |
| 14557 | C130037N1  | RIKEN cDNA C130037N17 gene                                         | 4.3 | 3.3 |
| 14244 | 2410005H0  | RIKEN cDNA 2410005H09 gene                                         | 2.1 | 3.2 |
| 14270 | Rnf43      | ring finger protein 43                                             | 2.6 | 3.2 |
| 14204 | Nap1l1 *   | nucleosome assembly protein 1-like 1                               | 1.1 | 3.2 |
| 14435 | Slc4a1ap   | Solute carrier family 4 (anion exchanger), member 1, adaptor p     | 0.8 | 3.2 |
| 14428 | Dgkk       | diacylglycerol kinase kappa                                        | 5.8 | 3.2 |
| 14493 | Sox4 *     | SRY-box containing gene 4                                          | 1.2 | 3.2 |
| 14390 | Mtac2d1 *  | membrane targeting (tandem) C2 domain containing 1                 | 3.1 | 3.2 |
| 14478 | Vnn1 *     | vanin 1                                                            | 1.9 | 3.2 |
| 14368 | Axin2 *    | axin2                                                              | 2.2 | 3.1 |
| 14335 | LOC672274  | similar to Transcription factor SOX-4                              | 1.2 | 3.1 |
| 14399 | Slc30a10 * | solute carrier family 30, member 10                                | 1.7 | 3.1 |
| 14283 | 2900062L11 | RIKEN cDNA 2900062L11 gene                                         | 5.0 | 3.1 |
| 14528 | Atic       | 5-aminoimidazole-4-carboxamide ribonucleotide formyltransferase    | 1.0 | 3.1 |
| 14379 | Nap1l1 *   | nucleosome assembly protein 1-like 1                               | 1.2 | 3.1 |
| 14192 | Gas5 *     | growth arrest specific 5                                           | 1.3 | 3.1 |
| 14186 | Egln3      | EGL nine homolog 3 (C. elegans)                                    | 1.4 | 3.1 |
| 14446 | Plaa       | phospholipase A2, activating protein                               | 4.3 | 3.1 |
| 14229 | Acot1 *    | acyl-CoA thioesterase 1                                            | 1.1 | 3.0 |
| 14176 | Cmkor1     | chemokine orphan receptor 1                                        | 1.5 | 3.0 |
| 14529 | Nol8 *     | nucleolar protein 8                                                | 1.9 | 3.0 |
| 14564 | ---        | ---                                                                | 3.4 | 3.0 |
| 14486 | Enpep      | glutamyl aminopeptidase                                            | 3.0 | 3.0 |
| 14408 | Lrp8       | low density lipoprotein receptor-related protein 8, apolipoprotein | 2.5 | 3.0 |
| 14491 | Sprr1a     | small proline-rich protein 1A                                      | 0.8 | 3.0 |
| 14194 | Ereg       | epiregulin                                                         | 2.5 | 3.0 |
| 14161 | Rbbp9      | retinoblastoma binding protein 9                                   | 1.5 | 3.0 |
| 14225 | Acs11 *    | acyl-CoA synthetase long-chain family member 1                     | 1.2 | 3.0 |
| 14337 | C630043F03 | RIKEN cDNA C630043F03 gene                                         | 1.8 | 3.0 |
| 14534 | 1110005A0  | RIKEN cDNA 1110005A03 gene                                         | 1.5 | 3.0 |
| 14547 | Phgdh *    | 3-phosphoglycerate dehydrogenase                                   | 1.2 | 3.0 |
| 14313 | Smoc2 *    | SPARC related modular calcium binding 2                            | 1.2 | 3.0 |
| 14244 | Tm4sf5     | transmembrane 4 superfamily member 5                               | 2.3 | 3.0 |
| 14158 | Hdgf       | hepatoma-derived growth factor                                     | 1.3 | 2.9 |
| 14436 | Sypl       | Synaptophysin-like protein                                         | 1.8 | 2.9 |
| 14385 | 1700001G1  | RIKEN cDNA 1700001G11 gene                                         | 2.0 | 2.9 |
| 14479 | 2410006H1  | RIKEN cDNA 2410006H16 gene                                         | 1.2 | 2.9 |
| 14549 | Mtm1       | X-linked myotubular myopathy gene 1                                | 1.8 | 2.9 |
| 14539 | Acpp       | acid phosphatase, prostate                                         | 0.1 | 2.9 |
| 14237 | 5630401D2  | RIKEN cDNA 5630401D24 gene                                         | 1.4 | 2.9 |
| 14554 | Kcnj11     | potassium inwardly rectifying channel, subfamily J, member 1       | 1.9 | 2.9 |
| 14267 | Cnn3 *     | calponin 3, acidic                                                 | 1.2 | 2.9 |
| 14427 | ---        | Transcribed locus                                                  | 2.6 | 2.9 |
| 14526 | Lrrtm1 *   | leucine rich repeat transmembrane neuronal 1                       | 0.9 | 2.9 |
| 14442 | ---        | ---                                                                | 9.8 | 2.9 |

|       |            |                                                                |     |     |
|-------|------------|----------------------------------------------------------------|-----|-----|
| 14334 | Tcf7       | transcription factor 7, T-cell specific                        | 2.5 | 2.9 |
| 14321 | Ecgf1      | endothelial cell growth factor 1 (platelet-derived)            | 2.3 | 2.9 |
| 14160 | Fabp5 *    | fatty acid binding protein 5, epidermal                        | 0.7 | 2.9 |
| 14427 | ---        | ---                                                            | 2.0 | 2.9 |
| 14265 | Nol5a *    | nucleolar protein 5A                                           | 1.5 | 2.9 |
| 14514 | Umps       | uridine monophosphate synthetase                               | 2.6 | 2.9 |
| 14489 | Thop1      | thimet oligopeptidase 1                                        | 1.7 | 2.9 |
| 14402 | Agpat7     | Nacylglycerol-3-phosphate O-acyltransferase 7 (lysophospha     | 1.2 | 2.9 |
| 14462 | ---        | 0 day neonate thymus cDNA, RIKEN full-length enriched librar   | 3.1 | 2.9 |
| 14497 | ---        | ---                                                            | 2.7 | 2.8 |
| 14546 | Psat1 *    | phosphoserine aminotransferase 1                               | 0.7 | 2.8 |
| 14251 | Shmt1 *    | serine hydroxymethyl transferase 1 (soluble)                   | 1.1 | 2.8 |
| 14164 | Tmed6      | transmembrane emp24 protein transport domain containing 6      | 2.4 | 2.8 |
| 14354 | C79267     | expressed sequence C79267                                      | 2.0 | 2.8 |
| 14195 | Olr1       | oxidized low density lipoprotein (lectin-like) receptor 1      | 1.2 | 2.8 |
| 14167 | Wee1       | wee 1 homolog (S. pombe)                                       | 1.2 | 2.8 |
| 14567 | Snai3      | snail homolog 3 (Drosophila)                                   | 1.8 | 2.8 |
| 14438 | Atp13a3 *  | ATPase type 13A3                                               | 1.7 | 2.8 |
| 14176 | Per2 *     | period homolog 2 (Drosophila)                                  | 1.6 | 2.8 |
| 14181 | Tcfap4     | transcription factor AP4                                       | 1.2 | 2.8 |
| 14200 | Lss        | lanosterol synthase                                            | 1.3 | 2.8 |
| 14317 | Prmt3 *    | protein arginine N-methyltransferase 3                         | 1.4 | 2.8 |
| 14264 | Jag2       | jagged 2                                                       | 1.0 | 2.8 |
| 14427 | 1700071K01 | RIKEN cDNA 1700071K01 gene                                     | 2.1 | 2.8 |
| 14171 | B230317C12 | RIKEN cDNA B230317C12 gene                                     | 2.3 | 2.8 |
| 14220 | Mycl1 *    | v-myc myelocytomatosis viral oncogene homolog 1, lung carci    | 1.2 | 2.7 |
| 14288 | Nolc1 *    | nucleolar and coiled-body phosphoprotein 1                     | 1.6 | 2.7 |
| 14167 | Ceacam12   | CEA-related cell adhesion molecule 12                          | 1.9 | 2.7 |
| 14342 | AA408556   | expressed sequence AA408556                                    | 1.3 | 2.7 |
| 14555 | Cnn3 *     | calponin 3, acidic                                             | 1.2 | 2.7 |
| 14234 | Decr2      | 2-4-dienoyl-Coenzyme A reductase 2, peroxisomal                | 0.9 | 2.7 |
| 14225 | Id2        | inhibitor of DNA binding 2                                     | 1.3 | 2.7 |
| 14285 | Ppat       | phosphoribosyl pyrophosphate amidotransferase                  | 1.6 | 2.7 |
| 14307 | Pmm1       | phosphomannomutase 1                                           | 1.2 | 2.7 |
| 14501 | Pla2g2a    | phospholipase A2, group IIA (platelets, synovial fluid)        | 1.1 | 2.7 |
| 14506 | Mt4        | metallothionein 4                                              | 0.9 | 2.7 |
| 14527 | Nap1l1 *   | nucleosome assembly protein 1-like 1                           | 1.2 | 2.7 |
| 14249 | Steap1     | six transmembrane epithelial antigen of the prostate 1         | 1.3 | 2.7 |
| 14509 | Nol5       | nucleolar protein 5                                            | 1.4 | 2.7 |
| 14324 | Ube4b      | ubiquitination factor E4B, UFD2 homolog (S. cerevisiae)        | 1.8 | 2.7 |
| 14170 | Bid        | BH3 interacting domain death agonist                           | 2.6 | 2.6 |
| 14266 | Kctd14     | potassium channel tetramerisation domain containing 14         | 4.5 | 2.6 |
| 14526 | Tubb2b *   | tubulin, beta 2b                                               | 1.4 | 2.6 |
| 14364 | Whrn       | whirlin                                                        | 1.3 | 2.6 |
| 14457 | 2310047M1  | RIKEN cDNA 2310047M15 gene                                     | 2.3 | 2.6 |
| 14402 | ---        | Transcribed locus, weakly similar to XP_417295.1 PREDICTED:    | 1.1 | 2.6 |
| 14187 | Comt       | catechol-O-methyltransferase                                   | 2.7 | 2.6 |
| 14490 | Slc16a3    | solute carrier family 16 (monocarboxylic acid transporters), m | 1.1 | 2.6 |
| 14174 | Tex19      | testis expressed gene 19                                       | 0.4 | 2.6 |
| 14548 | Tmem18     | transmembrane protein 18                                       | 2.3 | 2.6 |
| 14500 | Nolc1 *    | nucleolar and coiled-body phosphoprotein 1                     | 1.5 | 2.6 |

|       |            |                                                                |     |     |
|-------|------------|----------------------------------------------------------------|-----|-----|
| 14510 | Psat1 *    | phosphoserine aminotransferase 1                               | 0.8 | 2.6 |
| 14267 | Prmt3 *    | protein arginine N-methyltransferase 3                         | 1.8 | 2.6 |
| 14218 | LOC630729  | similar to Glutathione reductase, mitochondrial precursor (GR) | 1.0 | 2.6 |
| 14486 | Dvl2       | dishevelled 2, dsh homolog (Drosophila)                        | 0.1 | 2.6 |
| 14573 | Amy2       | Amylase 2, pancreatic                                          | 3.3 | 2.6 |
| 14574 | ---        | Transcribed locus                                              | 3.9 | 2.6 |
| 14219 | Notch3     | Notch gene homolog 3 (Drosophila)                              | 1.7 | 2.6 |
| 14290 | 1110012J17 | RIKEN cDNA 1110012J17 gene                                     | 1.2 | 2.6 |
| 14359 | B4galnt4   | beta-1,4-N-acetyl-galactosaminyl transferase 4                 | 1.0 | 2.6 |
| 14246 | Tcof1      | Treacher Collins Franceschetti syndrome 1, homolog             | 1.4 | 2.6 |
| 14387 | Slc30a10 * | solute carrier family 30, member 10                            | 1.6 | 2.6 |
| 14312 | Mga        | MAX gene associated                                            | 1.1 | 2.6 |
| 14172 | Amacr      | alpha-methylacyl-CoA racemase                                  | 2.5 | 2.6 |
| 14259 | Hsp110 *   | heat shock protein 110                                         | 2.2 | 2.6 |
| 14374 | Pcsk9      | proprotein convertase subtilisin/kexin type 9                  | 1.5 | 2.6 |
| 14343 | Kpnb1      | karyopherin (importin) beta 1                                  | 0.8 | 2.6 |
| 14250 | E430018J23 | RIKEN cDNA E430018J23 gene                                     | 2.1 | 2.5 |
| 14167 | Nme4       | expressed in non-metastatic cells 4, protein                   | 1.3 | 2.5 |
| 14513 | Fytd1      | forty-two-three domain containing 1                            | 3.1 | 2.5 |
| 14540 | Neto2 *    | neuropilin (NRP) and tolloid (TLL)-like 2                      | 0.7 | 2.5 |
| 14292 | 2310030N0  | RIKEN cDNA 2310030N02 gene                                     | 1.3 | 2.5 |
| 14377 | Apex1 *    | apurinic/aprimidinic endonuclease 1                            | 1.6 | 2.5 |
| 14288 | Nolc1 *    | nucleolar and coiled-body phosphoprotein 1                     | 2.7 | 2.5 |
| 14350 | Sypl       | synaptophysin-like protein                                     | 1.9 | 2.5 |
| 14302 | 4933406C10 | RIKEN cDNA 4933406C10 gene                                     | 1.2 | 2.5 |
| 14211 | Jag1       | jagged 1                                                       | 1.5 | 2.5 |
| 14239 | 2210010N0  | RIKEN cDNA 2210010N04 gene                                     | 1.4 | 2.5 |
| 14257 | Vmd2l1     | vitelliform macular dystrophy 2-like protein 1                 | 1.9 | 2.5 |
| 14184 | Vnn1 *     | vanin 1                                                        | 1.7 | 2.5 |
| 14539 | Htf9c      | HpaII tiny fragments locus 9c                                  | 1.7 | 2.5 |
| 14324 | Npm1       | nucleophosmin 1                                                | 1.4 | 2.5 |
| 14173 | Snrpa1     | small nuclear ribonucleoprotein polypeptide A'                 | 1.8 | 2.5 |
| 14478 | Vps52      | vacuolar protein sorting 52 (yeast)                            | 1.0 | 2.5 |
| 14337 | Slc39a10 * | solute carrier family 39 (zinc transporter), member 10         | 1.2 | 2.5 |
| 14334 | Glt25d1    | glycosyltransferase 25 domain containing 1                     | 2.1 | 2.5 |
| 14290 | Stub1      | STIP1 homology and U-Box containing protein 1                  | 1.2 | 2.5 |
| 14399 | Rpsud2     | RNA pseudouridylate synthase domain containing 2               | 1.5 | 2.5 |
| 14285 | Ccdc3      | coiled-coil domain containing 3                                | 1.0 | 2.5 |
| 14235 | Npm3       | nucleoplasmin 3                                                | 1.8 | 2.4 |
| 14183 | Nola1      | nucleolar protein family A, member 1 (H/ACA small nucleolar    | 1.8 | 2.4 |
| 14246 | Frag1      | FGF receptor activating protein 1                              | 1.1 | 2.4 |
| 14508 | Arvcf      | armadillo repeat gene deleted in velo-cardio-facial syndrome   | 1.6 | 2.4 |
| 14510 | Hars2      | histidyl tRNA synthetase 2                                     | 1.8 | 2.4 |
| 14487 | Dnajc2 *   | DnaJ (Hsp40) homolog, subfamily C, member 2                    | 1.4 | 2.4 |
| 14360 | Thumpd1    | THUMP domain containing 1                                      | 1.8 | 2.4 |
| 14213 | Prox1      | prospero-related homeobox 1                                    | 1.8 | 2.4 |
| 14497 | AA414993   | expressed sequence AA414993                                    | 0.2 | 2.4 |
| 14187 | Ccl25      | chemokine (C-C motif) ligand 25                                | 2.3 | 2.4 |
| 14195 | Greb1      | gene regulated by estrogen in breast cancer protein            | 1.5 | 2.4 |
| 14337 | Nrip2      | nuclear receptor interacting protein 2                         | 1.7 | 2.4 |
| 14350 | Polr1e     | polymerase (RNA) I polypeptide E                               | 1.7 | 2.4 |

|       |            |                                                             |     |     |
|-------|------------|-------------------------------------------------------------|-----|-----|
| 14302 | 4930404H2  | RIKEN cDNA 4930404H21 gene                                  | 2.6 | 2.4 |
| 14238 | Acs11 *    | acyl-CoA synthetase long-chain family member 1              | 1.1 | 2.4 |
| 14415 | Fbx13      | F-box and leucine-rich repeat protein 3                     | 3.1 | 2.4 |
| 14191 | Deadc1     | deaminase domain containing 1                               | 1.7 | 2.4 |
| 14171 | Vav3 *     | vav 3 oncogene                                              | 0.8 | 2.4 |
| 14237 | Ppan       | peter pan homolog (Drosophila)                              | 1.9 | 2.4 |
| 14490 | Acot1 *    | acyl-CoA thioesterase 1                                     | 0.9 | 2.4 |
| 14330 | 6330526H1  | RIKEN cDNA 6330526H18 gene                                  | 2.4 | 2.4 |
| 14246 | D13Wsu177  | DNA segment, Chr 13, Wayne State University 177, expressed  | 1.6 | 2.4 |
| 14550 | Nol5a *    | nucleolar protein 5A                                        | 1.6 | 2.4 |
| 14337 | Dach1 *    | dachshund 1 (Drosophila)                                    | 1.2 | 2.4 |
| 14234 | Gsta3      | glutathione S-transferase, alpha 3                          | 0.5 | 2.4 |
| 14546 | Irf2bp2    | interferon regulatory factor 2 binding protein 2            | 1.4 | 2.4 |
| 14547 | Slc38a1    | solute carrier family 38, member 1                          | 3.9 | 2.4 |
| 14445 | LOC240038  | similar to reduced expression 2                             | 0.5 | 2.4 |
| 14177 | Thoc4      | THO complex 4                                               | 1.1 | 2.4 |
| 14528 | Cad        | carbamoyl-phosphate synthetase 2, aspartate transcarbamyla  | 1.6 | 2.4 |
| 14260 | Rgs16      | regulator of G-protein signaling 16                         | 1.3 | 2.4 |
| 14520 | Pla2g12a   | phospholipase A2, group XIA                                 | 1.1 | 2.4 |
| 14185 | Wasf1      | WASP family 1                                               | 2.0 | 2.4 |
| 14208 | Pkia       | protein kinase inhibitor, alpha                             | 1.9 | 2.4 |
| 14265 | Trp53      | transformation related protein 53                           | 1.1 | 2.4 |
| 14521 | BC053440   | cDNA sequence BC053440                                      | 1.4 | 2.4 |
| 14161 | Apex1 *    | apurinic/aprimidinic endonuclease 1                         | 1.6 | 2.4 |
| 14563 | Cep68 *    | centrosomal protein 68                                      | 1.6 | 2.4 |
| 14448 | ---        | ---                                                         | 3.8 | 2.4 |
| 14534 | 2600001A1  | RIKEN cDNA 2600001A11 gene                                  | 1.1 | 2.4 |
| 14374 | Tbx3 *     | T-box 3                                                     | 1.3 | 2.4 |
| 14238 | Noc4l      | nucleolar complex associated 4 homolog (S. cerevisiae)      | 2.0 | 2.4 |
| 14556 | Alkbh2     | alkB, alkylation repair homolog 2 (E. coli)                 | 2.0 | 2.4 |
| 14168 | Mut        | methylmalonyl-Coenzyme A mutase                             | 0.8 | 2.4 |
| 14353 | Kctd15     | potassium channel tetramerisation domain containing 15      | 1.5 | 2.3 |
| 14599 | LOC626877  | Similar to zinc finger protein 709                          | 3.7 | 2.3 |
| 14504 | Ncoa6ip    | nuclear receptor coactivator 6 interacting protein          | 1.4 | 2.3 |
| 14368 | Cnn3 *     | calponin 3, acidic                                          | 1.2 | 2.3 |
| 14296 | Lrrc17     | leucine rich repeat containing 17                           | 1.1 | 2.3 |
| 14513 | Zfyve19    | zinc finger, FYVE domain containing 19                      | 0.9 | 2.3 |
| 14220 | Cdh8       | cadherin 8                                                  | 4.8 | 2.3 |
| 14220 | Mycl1 *    | v-myc myelocytomatosis viral oncogene homolog 1, lung carci | 1.0 | 2.3 |
| 14566 | Mthfd1l    | methylenetetrahydrofolate dehydrogenase (NADP+ dependent    | 1.4 | 2.3 |
| 14486 | Wdr12      | WD repeat domain 12                                         | 1.7 | 2.3 |
| 14376 | 3321401G0  | RIKEN cDNA 3321401G04 gene                                  | 1.2 | 2.3 |
| 14221 | Shmt1 *    | serine hydroxymethyl transferase 1 (soluble)                | 1.1 | 2.3 |
| 14437 | Cyp20a1    | cytochrome P450, family 20, subfamily A, polypeptide 1      | 2.6 | 2.3 |
| 14447 | Abtb2      | ankyrin repeat and BTB (POZ) domain containing 2            | 1.6 | 2.3 |
| 14495 | Tpm2       | tropomyosin 2, beta                                         | 0.8 | 2.3 |
| 14176 | Per2 *     | period homolog 2 (Drosophila)                               | 1.7 | 2.3 |
| 14563 | Aldh3b2    | aldehyde dehydrogenase 3 family, member B2                  | 1.0 | 2.3 |
| 14606 | 2410002F23 | RIKEN cDNA 2410002F23 gene                                  | 1.6 | 2.3 |
| 14217 | Efna4      | ephrin A4                                                   | 1.2 | 2.3 |
| 14242 | Polr3h     | polymerase (RNA) III (DNA directed) polypeptide H           | 1.5 | 2.3 |

|       |            |                                                             |     |     |
|-------|------------|-------------------------------------------------------------|-----|-----|
| 14355 | 2010109N1  | RIKEN cDNA 2010109N14 gene                                  | 1.4 | 2.3 |
| 14218 | Rps18      | ribosomal protein S18                                       | 1.1 | 2.3 |
| 14560 | Apex1 *    | apurinic/aprimidinic endonuclease 1                         | 1.2 | 2.3 |
| 14207 | Tex15      | testis expressed gene 15                                    | 1.1 | 2.3 |
| 14211 | Areg       | amphiregulin                                                | 1.9 | 2.3 |
| 14421 | 4632427E13 | RIKEN cDNA 4632427E13 gene                                  | 2.3 | 2.3 |
| 14366 | 6720401G1  | RIKEN cDNA 6720401G13 gene                                  | 0.9 | 2.3 |
| 14367 | Cnn3 *     | calponin 3, acidic                                          | 1.1 | 2.3 |
| 14514 | Aldoc      | aldolase 3, C isoform                                       | 1.6 | 2.3 |
| 14588 | 4732468M1  | RIKEN cDNA 4732468M13 gene                                  | 0.3 | 2.3 |
| 14541 | Ccdc86     | coiled-coil domain containing 86                            | 1.5 | 2.3 |
| 14277 | Cftr       | cystic fibrosis transmembrane conductance regulator homolog | 1.0 | 2.3 |
| 14234 | Mybbp1a *  | MYB binding protein (P160) 1a                               | 1.7 | 2.3 |
| 14476 | Rpl24      | ribosomal protein L24                                       | 1.1 | 2.3 |
| 14186 | Ube2h      | ubiquitin-conjugating enzyme E2H                            | 0.8 | 2.3 |
| 14557 | Picalm     | Phosphatidylinositol binding clathrin assembly protein      | 2.9 | 2.3 |
| 14257 | Mtac2d1 *  | membrane targeting (tandem) C2 domain containing 1          | 3.1 | 2.3 |
| 14312 | Prdx4      | peroxiredoxin 4                                             | 0.6 | 2.3 |
| 14336 | Snord22 *  | small nucleolar RNA, C/D box 22                             | 1.2 | 2.3 |
| 14376 | Phgdh *    | 3-phosphoglycerate dehydrogenase                            | 0.8 | 2.3 |
| 14291 | Wdr34      | WD repeat domain 34                                         | 1.9 | 2.3 |
| 14191 | Sox4 *     | SRY-box containing gene 4                                   | 0.9 | 2.3 |
| 14401 | 9630027E11 | hypothetical protein 9630027E11                             | 0.1 | 2.3 |
| 14239 | Krt2-7     | keratin complex 2, basic, gene 7                            | 0.9 | 2.3 |
| 14558 | 2700023E23 | RIKEN cDNA 2700023E23 gene                                  | 1.5 | 2.3 |
| 14527 | Txn2       | thioredoxin 2                                               | 1.5 | 2.3 |
| 14390 | MGC117846  | Similar to zinc finger protein 665                          | 1.2 | 2.3 |
| 14380 | Rab11fip3  | RAB11 family interacting protein 3 (class II)               | 1.4 | 2.3 |
| 14168 | Fgd1       | FYVE, RhoGEF and PH domain containing 1                     | 1.8 | 2.3 |
| 14506 | Acsl1 *    | acyl-CoA synthetase long-chain family member 1              | 1.1 | 2.2 |
| 14508 | Solh       | small optic lobes homolog (Drosophila)                      | 2.0 | 2.2 |
| 14384 | Nabl       | nebulette                                                   | 1.9 | 2.2 |
| 14524 | Cd44       | CD44 antigen                                                | 1.0 | 2.2 |
| 14486 | Cyp2d26    | cytochrome P450, family 2, subfamily d, polypeptide 26      | 3.5 | 2.2 |
| 14596 | Snf1lk     | SNF1-like kinase                                            | 1.7 | 2.2 |
| 14291 | 8430438M0  | RIKEN cDNA 8430438M01 gene                                  | 1.6 | 2.2 |
| 14264 | Shmt2      | serine hydroxymethyl transferase 2 (mitochondrial)          | 1.0 | 2.2 |
| 14452 | BC023969   | cDNA sequence BC023969                                      | 1.7 | 2.2 |
| 14551 | Gloxd1     | glyoxalase domain containing 1                              | 2.5 | 2.2 |
| 14157 | Ncl *      | nucleolin                                                   | 1.3 | 2.2 |
| 14180 | Tfpt *     | TCF3 (E2A) fusion partner                                   | 1.1 | 2.2 |
| 14206 | Dach1 *    | dachshund 1 (Drosophila)                                    | 1.5 | 2.2 |
| 14301 | Reep6      | receptor accessory protein 6                                | 1.2 | 2.2 |
| 14159 | Sf3b3 *    | splicing factor 3b, subunit 3                               | 1.5 | 2.2 |
| 14272 | Palld      | palladin, cytoskeletal associated protein                   | 2.4 | 2.2 |
| 14184 | Pus3       | pseudouridine synthase 3                                    | 2.4 | 2.2 |
| 14360 | Cep68 *    | centrosomal protein 68                                      | 1.7 | 2.2 |
| 14486 | Vav3 *     | vav 3 oncogene                                              | 0.9 | 2.2 |
| 14456 | ---        | ---                                                         | 1.4 | 2.2 |
| 14266 | Phgdh *    | 3-phosphoglycerate dehydrogenase                            | 0.7 | 2.2 |
| 14556 | Rps3       | ribosomal protein S3                                        | 1.2 | 2.2 |



|       |            |                                                                 |     |     |
|-------|------------|-----------------------------------------------------------------|-----|-----|
| 14224 | Cdk4 *     | cyclin-dependent kinase 4                                       | 1.3 | 2.2 |
| 14490 | Eef1e1     | eukaryotic translation elongation factor 1 epsilon 1            | 1.9 | 2.2 |
| 14519 | Recc1      | replication factor C 1                                          | 1.1 | 2.2 |
| 14196 | 1700010I14 | RIKEN cDNA 1700010I14 gene                                      | 1.5 | 2.2 |
| 14189 | Pam        | peptidylglycine alpha-amidating monooxygenase                   | 3.8 | 2.2 |
| 14238 | 2610012O2  | RIKEN cDNA 2610012O22 gene                                      | 1.9 | 2.2 |
| 14510 | Nol11      | nucleolar protein 11                                            | 0.8 | 2.2 |
| 14577 | Zfp192     | zinc finger protein 192                                         | 0.4 | 2.2 |
| 14527 | Prmt1      | protein arginine N-methyltransferase 1                          | 1.1 | 2.2 |
| 14242 | Ifitm1     | interferon induced transmembrane protein 1                      | 0.7 | 2.2 |
| 14335 | LOC622534  | similar to ribosomal protein L36                                | 1.2 | 2.2 |
| 14171 | Vav3 *     | vav 3 oncogene                                                  | 0.8 | 2.2 |
| 14365 | 1110008H0  | RIKEN cDNA 1110008H02 gene                                      | 1.4 | 2.2 |
| 14528 | Ddx10      | DEAD (Asp-Glu-Ala-Asp) box polypeptide 10                       | 1.4 | 2.2 |
| 14231 | Gtbbp4 *   | GTP binding protein 4                                           | 1.3 | 2.2 |
| 14178 | Gcat *     | glycine C-acetyltransferase (2-amino-3-ketobutyrate-coenzy      | 1.7 | 2.2 |
| 14163 | Fkbp4      | FK506 binding protein 4                                         | 1.5 | 2.2 |
| 14494 | Il12b      | interleukin 12b                                                 | 1.4 | 2.2 |
| 14508 | Gtbbp4 *   | GTP binding protein 4                                           | 1.7 | 2.2 |
| 14346 | Gpr22      | G protein-coupled receptor 22                                   | 1.0 | 2.2 |
| 14252 | Gngt1 *    | guanine nucleotide binding protein (G protein), gamma transd    | 0.6 | 2.2 |
| 14418 | Seh1l      | SEH1-like (S. cerevisiae)                                       | 1.2 | 2.2 |
| 14287 | Bri3bp *   | Bri3 binding protein                                            | 1.4 | 2.2 |
| 14171 | Exosc5     | exosome component 5                                             | 1.3 | 2.2 |
| 14160 | Abce1 *    | ATP-binding cassette, sub-family E (OABP), member 1             | 1.9 | 2.2 |
| 14176 | Dnajc2 *   | DnaJ (Hsp40) homolog, subfamily C, member 2                     | 1.6 | 2.2 |
| 14279 | Rdh9       | retinol dehydrogenase 9                                         | 1.1 | 2.2 |
| 14511 | Idi1       | isopentenyl-diphosphate delta isomerase                         | 1.2 | 2.2 |
| 14359 | Rps6       | ribosomal protein S6                                            | 1.8 | 2.2 |
| 14507 | Hmga2 *    | high mobility group AT-hook 2                                   | 1.8 | 2.2 |
| 14441 | Odf2       | outer dense fiber of sperm tails 2                              | 1.3 | 2.2 |
| 14235 | Ptpn5      | protein tyrosine phosphatase, non-receptor type 5               | 4.7 | 2.2 |
| 14275 | Utrn *     | utrophin                                                        | 0.9 | 2.2 |
| 14257 | Rorc       | RAR-related orphan receptor gamma                               | 0.7 | 2.2 |
| 14372 | 2700081O1  | RIKEN cDNA 2700081O15 gene                                      | 1.5 | 2.2 |
| 14243 | Adhfe1     | alcohol dehydrogenase, iron containing, 1                       | 1.3 | 2.2 |
| 14484 | 2410016O0  | RIKEN cDNA 2410016O06 gene                                      | 1.7 | 2.2 |
| 14495 | Zfr        | zinc finger RNA binding protein                                 | 1.5 | 2.2 |
| 14236 | Cdca4      | cell division cycle associated 4                                | 1.5 | 2.2 |
| 14516 | Wdr75      | WD repeat domain 75                                             | 1.7 | 2.2 |
| 14373 | F2r        | coagulation factor II (thrombin) receptor                       | 0.9 | 2.2 |
| 14512 | Ikbkap     | inhibitor of kappa light polypeptide enhancer in B-cells, kinas | 1.3 | 2.2 |
| 14563 | Cnn3 *     | calponin 3, acidic                                              | 1.2 | 2.2 |
| 14278 | Dnttip2    | deoxynucleotidyltransferase, terminal, interacting protein 2    | 1.5 | 2.2 |
| 14480 | ---        | Adult male medulla oblongata cDNA, RIKEN full-length enrich     | 1.6 | 2.2 |
| 14159 | Smoc2 *    | SPARC related modular calcium binding 2                         | 1.5 | 2.2 |
| 14533 | Xrcc6bp1   | XRCC6 binding protein 1                                         | 1.6 | 2.1 |
| 14522 | Utrn *     | utrophin                                                        | 1.0 | 2.1 |
| 14167 | Rcl1       | RNA terminal phosphate cyclase-like 1                           | 1.7 | 2.1 |
| 14494 | Gas5 *     | growth arrest specific 5                                        | 1.3 | 2.1 |
| 14561 | 2600005C20 | RIKEN cDNA 2600005C20 gene                                      | 1.2 | 2.1 |

|       |            |                                                                  |     |     |
|-------|------------|------------------------------------------------------------------|-----|-----|
| 14486 | Ccnd1      | cyclin D1                                                        | 1.7 | 2.1 |
| 14541 | Pcgf6      | polycomb group ring finger 6                                     | 1.5 | 2.1 |
| 14225 | Ilf3       | interleukin enhancer binding factor 3                            | 0.7 | 2.1 |
| 14592 | ---        | ---                                                              | 1.8 | 2.1 |
| 14350 | Utp14a     | UTP14, U3 small nucleolar ribonucleoprotein, homolog A (yeas     | 1.7 | 2.1 |
| 14501 | Ikbkg *    | inhibitor of kappaB kinase gamma                                 | 1.2 | 2.1 |
| 14231 | Wdr4       | WD repeat domain 4                                               | 1.2 | 2.1 |
| 14237 | Igfbp4 *   | insulin-like growth factor binding protein 4                     | 1.2 | 2.1 |
| 14167 | Oprs1      | opioid receptor, sigma 1                                         | 1.7 | 2.1 |
| 14159 | Nup62      | nucleoporin 62                                                   | 1.7 | 2.1 |
| 14517 | Hod        | homeobox only domain                                             | 1.5 | 2.1 |
| 14363 | Rora       | RAR-related orphan receptor alpha                                | 1.4 | 2.1 |
| 14507 | Syncrip *  | synaptotagmin binding, cytoplasmic RNA interacting protein       | 1.2 | 2.1 |
| 14336 | Snord22 *  | small nucleolar RNA, C/D box 22                                  | 1.3 | 2.1 |
| 14283 | Ddit4      | DNA-damage-inducible transcript 4                                | 1.3 | 2.1 |
| 14499 | Zfp2 *     | zinc finger protein 2                                            | 1.3 | 2.1 |
| 14399 | Cyp11a1    | cytochrome P450, family 11, subfamily a, polypeptide 1           | 2.8 | 2.1 |
| 14512 | 2310061I09 | RIKEN cDNA 2310061I09 gene                                       | 2.0 | 2.1 |
| 14183 | Terf1      | telomeric repeat binding factor 1                                | 1.5 | 2.1 |
| 14157 | Ncl *      | nucleolin                                                        | 1.5 | 2.1 |
| 14235 | Slc1a4 *   | solute carrier family 1 (glutamate/neutral amino acid transpor   | 1.5 | 2.1 |
| 14485 | Tead2      | TEA domain family member 2                                       | 1.1 | 2.1 |
| 14160 | Fabp5 *    | fatty acid binding protein 5, epidermal                          | 0.7 | 2.1 |
| 14486 | Fzd6       | frizzled homolog 6 (Drosophila)                                  | 1.3 | 2.1 |
| 14210 | Agpat1     | 1-acylglycerol-3-phosphate O-acyltransferase 1 (lysophosph       | 1.5 | 2.1 |
| 14256 | LOC669007  | similar to General transcription factor II-I (GTFII-I)           | 1.4 | 2.1 |
| 14488 | Ankrd47    | ankyrin repeat domain 47                                         | 2.3 | 2.1 |
| 14549 | Slc7a1     | solute carrier family 7 (cationic amino acid transporter, y+ sys | 1.3 | 2.1 |
| 14219 | Cbx5       | chromobox homolog 5 (Drosophila HP1a)                            | 1.5 | 2.1 |
| 14208 | Mrps2      | mitochondrial ribosomal protein S2                               | 1.0 | 2.1 |
| 14178 | Hsd17b7    | hydroxysteroid (17-beta) dehydrogenase 7                         | 1.3 | 2.1 |
| 14383 | 2810421I24 | RIKEN cDNA 2810421I24 gene                                       | 0.9 | 2.1 |
| 14302 | Wdr77 *    | WD repeat domain 77                                              | 1.5 | 2.1 |
| 14162 | Gart       | phosphoribosylglycinamide formyltransferase                      | 1.2 | 2.1 |
| 14491 | Polr3g     | polymerase (RNA) III (DNA directed) polypeptide G                | 1.6 | 2.1 |
| 14243 | Noc2l      | nucleolar complex associated 2 homolog (S. cerevisiae)           | 1.5 | 2.1 |
| 14439 | 9230110C19 | RIKEN cDNA 9230110C19 gene                                       | 1.5 | 2.1 |
| 14289 | Nol8 *     | nucleolar protein 8                                              | 1.2 | 2.1 |
| 14269 | ---        | ---                                                              | 1.1 | 2.1 |
| 14390 | Slc39a10 * | solute carrier family 39 (zinc transporter), member 10           | 1.0 | 2.1 |
| 14182 | Lims1      | LIM and senescent cell antigen-like domains 1                    | 1.0 | 2.1 |
| 14480 | Tbx3 *     | T-box 3                                                          | 1.5 | 2.1 |
| 14160 | Ddx18      | DEAD (Asp-Glu-Ala-Asp) box polypeptide 18                        | 1.5 | 2.1 |
| 14372 | Marcks1    | MARCKS-like 1                                                    | 1.4 | 2.1 |
| 14410 | A430041B07 | RIKEN cDNA A430041B07 gene                                       | 0.7 | 2.1 |
| 14547 | AI173486   | expressed sequence AI173486                                      | 1.6 | 2.1 |
| 14165 | Ctps       | cytidine 5'-triphosphate synthase                                | 1.6 | 2.1 |
| 14486 | Mvd        | mevalonate (diphospho) decarboxylase                             | 1.2 | 2.1 |
| 14482 | Ddx21 *    | DEAD (Asp-Glu-Ala-Asp) box polypeptide 21                        | 1.4 | 2.1 |
| 14334 | Epb4.1I2   | erythrocyte protein band 4.1-like 2                              | 1.0 | 2.1 |
| 14287 | Bri3bp *   | Bri3 binding protein                                             | 1.4 | 2.1 |

|       |            |                                                                  |     |     |
|-------|------------|------------------------------------------------------------------|-----|-----|
| 14219 | Pfdn2      | prefoldin 2                                                      | 1.3 | 2.1 |
| 14287 | Aasdhppt   | aminoadipate-semialdehyde dehydrogenase-phosphopanteth           | 1.5 | 2.1 |
| 14163 | Timm8a1    | translocase of inner mitochondrial membrane 8 homolog a1 (y      | 1.4 | 2.1 |
| 14241 | Fance *    | Fanconi anemia, complementation group E                          | 1.4 | 2.1 |
| 14374 | B3galt2    | UDP-Gal:betaGlcNAc beta 1,3-galactosyltransferase, polypepti     | 0.9 | 2.1 |
| 14570 | 2410127E16 | RIKEN cDNA 2410127E16 gene                                       | 1.0 | 2.1 |
| 14524 | Erdr1      | erythroid differentiation regulator 1                            | 2.2 | 2.1 |
| 14510 | Ifrd2      | interferon-related developmental regulator 2                     | 1.5 | 2.1 |
| 14354 | AI464131   | expressed sequence AI464131                                      | 1.0 | 2.1 |
| 14482 | Ddx21 *    | DEAD (Asp-Glu-Ala-Asp) box polypeptide 21                        | 1.3 | 2.1 |
| 14530 | Wdr5b      | WD repeat domain 5B                                              | 2.1 | 2.1 |
| 14235 | Slc1a4 *   | solute carrier family 1 (glutamate/neutral amino acid transpor   | 1.6 | 2.1 |
| 14539 | Ide        | insulin degrading enzyme                                         | 1.2 | 2.1 |
| 14341 | Nfib       | nuclear factor I/B                                               | 0.8 | 2.1 |
| 14329 | 5730407O0  | RIKEN cDNA 5730407O05 gene                                       | 0.3 | 2.1 |
| 14522 | Gfer       | growth factor, erv1 (S. cerevisiae)-like (augmenter of liver reg | 1.4 | 2.1 |
| 14285 | 2810026P18 | RIKEN cDNA 2810026P18 gene                                       | 1.4 | 2.1 |
| 14482 | C1qbp      | complement component 1, q subcomponent binding protein           | 1.4 | 2.1 |
| 14157 | Ncl *      | nucleolin                                                        | 1.2 | 2.1 |
| 14381 | ---        | ---                                                              | 1.4 | 2.1 |
| 14212 | Srm        | spermidine synthase                                              | 1.6 | 2.1 |
| 14520 | Hes6       | hairy and enhancer of split 6 (Drosophila)                       | 1.7 | 2.1 |
| 14160 | AL033314   | expressed sequence AL033314                                      | 1.0 | 2.1 |
| 14183 | Nucb2      | nucleobindin 2                                                   | 1.6 | 2.1 |
| 14407 | 4833422C13 | RIKEN cDNA 4833422C13 gene                                       | 0.7 | 2.1 |
| 14483 | Stx1a      | syntaxin 1A (brain)                                              | 1.5 | 2.1 |
| 14283 | Wdr43      | WD repeat domain 43                                              | 1.6 | 2.1 |
| 14489 | Pcdhb17    | protocadherin beta 17                                            | 1.2 | 2.1 |
| 14294 | Polr3e     | polymerase (RNA) III (DNA directed) polypeptide E                | 1.6 | 2.1 |
| 14353 | Taf4b      | TAF4B RNA polymerase II, TATA box binding protein (TBP)-as       | 1.2 | 2.1 |
| 14248 | Gas5 *     | growth arrest specific 5                                         | 1.6 | 2.1 |
| 14166 | Nola2 *    | nucleolar protein family A, member 2                             | 1.7 | 2.1 |
| 14166 | Nola2 *    | nucleolar protein family A, member 2                             | 1.6 | 2.1 |
| 14519 | 2810453I06 | RIKEN cDNA 2810453I06 gene                                       | 1.4 | 2.1 |
| 14394 | 4930403C10 | RIKEN cDNA 4930403C10 gene                                       | 1.0 | 2.1 |
| 14171 | Cstf1      | cleavage stimulation factor, 3' pre-RNA, subunit 1               | 0.3 | 2.0 |
| 14517 | Ogt        | O-linked N-acetylglucosamine (GlcNAc) transferase (UDP-N-a       | 1.3 | 2.0 |
| 14550 | 1500012F01 | RIKEN cDNA 1500012F01 gene                                       | 1.2 | 2.0 |
| 14559 | LOC673503  | hypothetical protein LOC673503                                   | 1.6 | 2.0 |
| 14266 | Tmem34     | transmembrane protein 34                                         | 1.1 | 2.0 |
| 14552 | Cdk6       | cyclin-dependent kinase 6                                        | 1.5 | 2.0 |
| 14363 | Gemin5     | gem (nuclear organelle) associated protein 5                     | 0.9 | 2.0 |
| 14182 | 2610024G1  | RIKEN cDNA 2610024G14 gene                                       | 1.5 | 2.0 |
| 14176 | Drg2       | developmentally regulated GTP binding protein 2                  | 1.2 | 2.0 |
| 14558 | Lrrtm1 *   | leucine rich repeat transmembrane neuronal 1                     | 0.7 | 2.0 |
| 14301 | Cd3eap     | CD3E antigen, epsilon polypeptide associated protein             | 1.9 | 2.0 |
| 14521 | Eprs       | glutamyl-prolyl-tRNA synthetase                                  | 1.1 | 2.0 |
| 14286 | A930016P21 | RIKEN cDNA A930016P21 gene                                       | 0.9 | 2.0 |
| 14541 | Pwp1       | PWP1 homolog (S. cerevisiae)                                     | 1.7 | 2.0 |
| 14303 | Gusb       | glucuronidase, beta                                              | 1.2 | 2.0 |
| 14584 | Pou6f2     | POU domain, class 6, transcription factor 2                      | 2.5 | 2.0 |

|       |            |                                                               |     |     |
|-------|------------|---------------------------------------------------------------|-----|-----|
| 14484 | Gas1       | growth arrest specific 1                                      | 1.4 | 2.0 |
| 14219 | Igfbp4 *   | insulin-like growth factor binding protein 4                  | 1.0 | 2.0 |
| 14224 | Itga6      | integrin alpha 6                                              | 0.9 | 2.0 |
| 14337 | Slc9a9     | solute carrier family 9 (sodium/hydrogen exchanger), isoform  | 1.2 | 2.0 |
| 14507 | Defcr5     | defensin related cryptdin 5                                   | 1.9 | 2.0 |
| 14439 | Mtac2d1 *  | membrane targeting (tandem) C2 domain containing 1            | 4.1 | 2.0 |
| 14524 | Metap1     | methionine aminopeptidase-like 1                              | 0.9 | 2.0 |
| 14281 | 2610019A0  | RIKEN cDNA 2610019A05 gene                                    | 1.0 | 2.0 |
| 14413 | Nkrf       | NF-kappaB repressing factor                                   | 1.1 | 2.0 |
| 14248 | Kcnma1     | potassium large conductance calcium-activated channel, subf   | 1.6 | 2.0 |
| 14207 | Art2b      | ADP-ribosyltransferase 2b                                     | 2.1 | 2.0 |
| 14537 | Cpa4       | carboxypeptidase A4                                           | 1.2 | 2.0 |
| 14270 | 4933439F18 | RIKEN cDNA 4933439F18 gene                                    | 0.9 | 2.0 |
| 14245 | Nudt6      | nudix (nucleoside diphosphate linked moiety X)-type motif 6   | 1.3 | 2.0 |
| 14369 | Grhl3      | grainyhead-like 3 (Drosophila)                                | 1.2 | 2.0 |
| 14228 | Wdr77 *    | WD repeat domain 77                                           | 1.6 | 2.0 |
| 14515 | Sox9       | SRY-box containing gene 9                                     | 2.1 | 2.0 |
| 14509 | Gtpbp3     | GTP binding protein 3                                         | 1.4 | 2.0 |
| 14514 | Lyplal1    | lysophospholipase-like 1                                      | 1.6 | 2.0 |
| 14522 | Las1l      | LAS1-like (S. cerevisiae)                                     | 1.6 | 2.0 |
| 14262 | Noc3l      | nucleolar complex associated 3 homolog (S. cerevisiae)        | 1.6 | 2.0 |
| 14176 | Slc12a2    | solute carrier family 12, member 2                            | 1.1 | 2.0 |
| 14339 | 6720458F09 | RIKEN cDNA 6720458F09 gene                                    | 0.9 | 2.0 |
| 14549 | Nob1       | NIN1/RPN12 binding protein 1 homolog (S. cerevisiae)          | 1.2 | 2.0 |
| 14176 | Gtf2f1     | general transcription factor IIF, polypeptide 1               | 1.2 | 2.0 |
| 14379 | ---        | Transcribed locus                                             | 1.0 | 2.0 |
| 14204 | Hoxa11     | homeo box A11                                                 | 1.0 | 2.0 |
| 14483 | Ttc3       | tetratricopeptide repeat domain 3                             | 1.8 | 2.0 |
| 14363 | 2700094K13 | RIKEN cDNA 2700094K13 gene                                    | 0.8 | 2.0 |
| 14524 | Phospho1   | phosphatase, orphan 1                                         | 1.2 | 2.0 |
| 14235 | Hnrpa1     | heterogeneous nuclear ribonucleoprotein A1                    | 0.9 | 2.0 |
| 14248 | Osbpl10    | oxysterol binding protein-like 10                             | 1.2 | 2.0 |
| 14433 | 2410042D2  | RIKEN cDNA 2410042D21 gene                                    | 2.3 | 2.0 |
| 14511 | 2410018C17 | RIKEN cDNA 2410018C17 gene                                    | 1.8 | 2.0 |
| 14380 | BC068171   | cDNA sequence BC068171                                        | 1.1 | 2.0 |
| 14227 | Limd1      | LIM domains containing 1                                      | 1.1 | 2.0 |
| 14518 | Mtac2d1 *  | membrane targeting (tandem) C2 domain containing 1            | 3.3 | 2.0 |
| 14175 | Eif4ebp1   | eukaryotic translation initiation factor 4E binding protein 1 | 0.8 | 2.0 |
| 14386 | B930041F14 | RIKEN cDNA B930041F14 gene                                    | 2.9 | 2.0 |
| 14236 | Fads1      | fatty acid desaturase 1                                       | 0.7 | 2.0 |
| 14573 | Slc20a2    | Solute carrier family 20, member 2                            | 1.1 | 2.0 |
| 14359 | Sdhc       | succinate dehydrogenase complex, subunit C, integral membra   | 1.0 | 2.0 |
| 14166 | Fbl        | fibrillarin                                                   | 1.3 | 2.0 |
| 14256 | Homer1     | homer homolog 1 (Drosophila)                                  | 2.2 | 2.0 |
| 14246 | 2610204L23 | RIKEN cDNA 2610204L23 gene                                    | 1.2 | 2.0 |
| 14357 | Gchfr      | GTP cyclohydrolase I feedback regulator                       | 1.0 | 2.0 |
| 14508 | Serpinh1   | serine (or cysteine) peptidase inhibitor, clade H, member 1   | 1.9 | 2.0 |
| 14250 | Ubx4       | UBX domain containing 4                                       | 1.0 | 2.0 |
| 14341 | D19Bwg135  | DNA segment, Chr 19, Brigham & Women's Genetics 1357 expr     | 1.6 | 2.0 |
| 14158 | Uhrf1      | ubiquitin-like, containing PHD and RING finger domains, 1     | 1.3 | 2.0 |
| 14476 | Mettl1     | methyltransferase-like 1                                      | 1.2 | 2.0 |

|       |            |                                                              |     |     |
|-------|------------|--------------------------------------------------------------|-----|-----|
| 14517 | Il1rn      | interleukin 1 receptor antagonist                            | 1.1 | 2.0 |
| 14265 | Zfp553     | zinc finger protein 553                                      | 1.4 | 2.0 |
| 14208 | Ywhag      | 3-monooxygenase/tryptophan 5-monooxygenase activation p      | 1.7 | 2.0 |
| 14169 | Rrs1       | RRS1 ribosome biogenesis regulator homolog (S. cerevisiae)   | 1.3 | 2.0 |
| 14336 | Surf2      | surfeit gene 2                                               | 1.4 | 2.0 |
| 14237 | Pdk1       | pyruvate dehydrogenase kinase, isoenzyme 1                   | 0.5 | 2.0 |
| 14420 | Abce1 *    | ATP-binding cassette, sub-family E (OABP), member 1          | 1.9 | 2.0 |
| 14292 | Ddah1      | dimethylarginine dimethylaminohydrolase 1                    | 1.4 | 2.0 |
| 14234 | Bzw2       | basic leucine zipper and W2 domains 2                        | 1.0 | 2.0 |
| 14219 | Nedd4      | neural precursor cell expressed, developmentally down-regult | 1.1 | 2.0 |
| 14421 | Atp13a3 *  | ATPase type 13A3                                             | 1.6 | 2.0 |
| 14389 | Tfpt *     | TCF3 (E2A) fusion partner                                    | 1.5 | 2.0 |
| 14389 | Ddx31      | DEAD/H (Asp-Glu-Ala-Asp/His) box polypeptide 31              | 2.0 | 2.0 |
| 14301 | Ccnd2      | cyclin D2                                                    | 2.2 | 2.0 |
| 14258 | Cacna2d1   | calcium channel, voltage-dependent, alpha2/delta subunit 1   | 2.0 | 2.0 |
| 14475 | Rpo1-4     | RNA polymerase 1-4                                           | 1.7 | 2.0 |
| 14224 | Cdk4 *     | cyclin-dependent kinase 4                                    | 1.3 | 2.0 |
| 14586 | ---        | Transcribed locus                                            | 1.9 | 2.0 |
| 14372 | B230312I18 | RIKEN cDNA B230312I18 gene                                   | 1.8 | 2.0 |
| 14379 | ---        | ---                                                          | 2.0 | 2.0 |
| 14208 | Slc25a30   | solute carrier family 25, member 30                          | 1.6 | 2.0 |
| 14523 | Hspa1a     | heat shock protein 1A                                        | 3.7 | 2.0 |
| 14373 | Aldh9a1    | aldehyde dehydrogenase 9, subfamily A1                       | 1.0 | 2.0 |
| 14603 | Acsl1 *    | acyl-CoA synthetase long-chain family member 1               | 1.2 | 2.0 |
| 14266 | LOC633640  | similar to CG10866-PA                                        | 1.7 | 2.0 |
| 14400 | BC031748   | cDNA sequence BC031748                                       | 0.9 | 2.0 |
| 14263 | Eif4b      | eukaryotic translation initiation factor 4B                  | 1.1 | 2.0 |
| 14495 | Supt16h    | suppressor of Ty 16 homolog (S. cerevisiae)                  | 0.9 | 2.0 |
| 14254 | H2-Ab1     | histocompatibility 2, class II antigen A, beta 1             | 2.5 | 2.0 |
| 14542 | 2410019A1  | RIKEN cDNA 2410019A14 gene                                   | 1.7 | 2.0 |
| 14478 | 2010109N1  | RIKEN cDNA 2010109N14 gene                                   | 1.4 | 2.0 |
| 14236 | 6530403A0  | RIKEN cDNA 6530403A03 gene                                   | 1.3 | 2.0 |
| 14509 | Got1       | glutamate oxaloacetate transaminase 1, soluble               | 1.5 | 2.0 |
| 14486 | Pole       | polymerase (DNA directed), epsilon                           | 1.1 | 2.0 |
| 14498 | Timm9      | translocase of inner mitochondrial membrane 9 homolog (yea   | 1.9 | 2.0 |
| 14480 | ---        | ---                                                          | 1.6 | 2.0 |
| 14596 | ---        | ---                                                          | 2.3 | 2.0 |
| 14509 | Ppp1r14b   | protein phosphatase 1, regulatory (inhibitor) subunit 14B    | 1.4 | 2.0 |
| 14370 | Sox21      | SRY-box containing gene 21                                   | 1.3 | 2.0 |
| 14363 | Trim37     | tripartite motif protein 37                                  | 1.6 | 2.0 |
| 14511 | Sf3b5 *    | splicing factor 3b, subunit 5                                | 1.1 | 2.0 |
| 14493 | Gpatc4     | G patch domain containing 4                                  | 1.3 | 2.0 |
| 14227 | Syncrip *  | synaptotagmin binding, cytoplasmic RNA interacting protein   | 1.2 | 2.0 |
| 14206 | Dnaja3     | DnaJ (Hsp40) homolog, subfamily A, member 3                  | 1.1 | 2.0 |
| 14195 | Fahd1      | fumarylacetoacetate hydrolase domain containing 1            | 1.2 | 2.0 |
| 14550 | Prpf38b    | PRP38 pre-mRNA processing factor 38 (yeast) domain contain   | 0.9 | 2.0 |
| 14222 | Msh3       | mutS homolog 3 (E. coli)                                     | 1.5 | 2.0 |
| 14158 | Scd2       | stearoyl-Coenzyme A desaturase 2                             | 1.0 | 2.0 |
| 14313 | 3110005L24 | RIKEN cDNA 3110005L24 gene                                   | 1.2 | 2.0 |
| 14481 | Ppp2r4     | protein phosphatase 2A, regulatory subunit B (PR 53)         | 1.4 | 2.0 |
| 14481 | Prps1 *    | phosphoribosyl pyrophosphate synthetase 1                    | 1.2 | 2.0 |

|       |            |                                                               |     |     |
|-------|------------|---------------------------------------------------------------|-----|-----|
| 14209 | 4933411K20 | RIKEN cDNA 4933411K20 gene                                    | 2.2 | 2.0 |
| 14521 | 2600005C20 | RIKEN cDNA 2600005C20 gene                                    | 1.3 | 2.0 |
| 14190 | Brca2      | breast cancer 2                                               | 1.6 | 2.0 |
| 14266 | Pus7       | pseudouridylate synthase 7 homolog ( <i>S. cerevisiae</i> )   | 1.2 | 2.0 |
| 14339 | Rpl13a     | ribosomal protein L13a                                        | 1.1 | 2.0 |
| 14412 | ---        | PREDICTED: <i>Mus musculus</i> hypothetical protein LOC626097 | 1.3 | 2.0 |
| 14158 | Impdh2     | inosine 5'-phosphate dehydrogenase 2                          | 1.5 | 2.0 |
| 14238 | Nsun2      | NOL1/NOP2/Sun domain family 2                                 | 1.5 | 2.0 |
| 14178 | 2700038N0  | RIKEN cDNA 2700038N03 gene                                    | 2.0 | 2.0 |
| 14558 | Grwd1      | glutamate-rich WD repeat containing 1                         | 1.3 | 2.0 |
| 14481 | 1110014J01 | RIKEN cDNA 1110014J01 gene                                    | 1.6 | 2.0 |

Genes which were previously identified as Wnt targets in colorectal cancer cell lines (van de Wattering et al., 2002; van der Flier et al., 2007) are indicated in grey. A total of 58 probes corresponding to 43 different genes are included in the table. The genes indicated with an asterisk are present more than once in the table.

**Table S2. Primer sequences for quantitative real-time RT-PCR**

| Genes          | Forward                         | Reverse                         |
|----------------|---------------------------------|---------------------------------|
| <i>Actb</i>    | 5'-CATCCGTAAAGACCTCTATGCCAAC-3' | 5'-ATGGAGCCACCGATCCACA-3'       |
| <i>Ascl2</i>   | 5'-AAGCACACCTTGACTGGTACG-3'     | 5'-AAGTGGACGTTTGACACCTTCA-3'    |
| <i>Bmi1</i>    | 5'-ATCCCCACTTAATGTGTGTCCT-3'    | 5'-CTTGCTGGTCTCCAAGTAACG-3'     |
| <i>Ccna2</i>   | 5'-AGGCTGACACTCTTTCCGAA-3'      | 5'-CCTCTGGGGAAAAAGGAAAG-3'      |
| <i>Ccnb1</i>   | 5'-TGCTTCCTGTTATGCAGCAC-3'      | 5'-GTGTACAGTTCAGCTGTGCCA-3'     |
| <i>Ccnd1</i>   | 5'-CATGTATCATCTAGCCATGCACGAG-3' | 5'-ATGCACAACAGGCCGCTACA-3'      |
| <i>Cdkn1a</i>  | 5'-CTGTCTTGCACTCTGGTGTCTGA-3'   | 5'-CCAATCTGCGCTTGGAGTGA-3'      |
| <i>Cdkn1b</i>  | 5'-TCGACGCCAGACGTAAACAG-3'      | 5'-TCTCAGTGCTTATACAGGATGTCCA-3' |
| <i>Cdkn1c</i>  | 5'-CGAGGAGCAGGACGAGAATC-3'      | 5'-GAAGAAGTCGTTTCGATTGGC-3'     |
| <i>Ctnnb1</i>  | 5'-CCTTGGATATCGCCAGGATGA-3'     | 5'-CAGATCAGGCAGCCCATCAA-3'      |
| <i>Ephb2</i>   | 5'-GCCGGCTTTACCTCTTTCGAC-3'     | 5'-GGCAGGCGAATGTCAAACCT-3'      |
| <i>Ephb3</i>   | 5'-CATGGACACGAAATGGGTGAC-3'     | 5'-GCGGATAGGATTCATGGCTTCA-3'    |
| <i>Gpx2</i>    | 5'-ATGGCTTACATTGCCAAGTCG-3'     | 5'-TGCCTCTGAACGTATTGAAGTC-3'    |
| <i>Hes1</i>    | 5'-ATAGCTCCCGGCATTCCAAG-3'      | 5'-GCGCGGTATTTCCCCAACAA-3'      |
| <i>Hopx</i>    | 5'-ACCAGGTGGAGATCCTGGAGTA-3'    | 5'-CCAGGCGCTGCTTAAACCAT-3'      |
| <i>Jag1</i>    | 5'-CCTCGGGTCAGTTTGAGCTG-3'      | 5'-CCTTGAGGCACACTTTGAAGTA-3'    |
| <i>Jag2</i>    | 5'-AGTTCCTGGATGGAAGACTGCAA-3'   | 5'-TGACCAGAGAGCAGGCAAGG-3'      |
| <i>Lgr5</i>    | 5'-TGCCCCGTGGCTTTCTTATC-3'      | 5'-TTTCCCAGGCTGCCCATATC-3'      |
| <i>Msi1</i>    | 5'-CCTCTCACGGCTTATGGGC-3'       | 5'-CTGTGGCAATCAAGGGACC-3'       |
| <i>Myb</i>     | 5'-CAATGTCTCAAAGCCTTTACCG-3'    | 5'-CATGACCAGAGTTCGAGCTGAGA-3'   |
| <i>Myc</i>     | 5'-GCTCGCCCAAATCCTGTACCT-3'     | 5'-TCTCCACAGACACCACATCAATTC-3'  |
| <i>Notch1</i>  | 5'-GATGGCCTCAATGGGTACAAG-3'     | 5'-TCGTTGTTGTTGATGTCACAGT-3'    |
| <i>Notch2</i>  | 5'-ATGTGGACGAGTGTCTGTTGC-3'     | 5'-GGAAGCATAGGCACAGTCATC-3'     |
| <i>Pcna</i>    | 5'-GTCTGCAGATGTGCCCTTG-3'       | 5'-GACACGCTGGCATCTCAGGA-3'      |
| <i>Slc12a2</i> | 5'-GCCGTACAGACTTCACGAAGATGA-3'  | 5'-TGTTAGCTGTGCTTGAATGCTCCT-3'  |
| <i>Sox9</i>    | 5'-GAGCCGGATCTGAAGAGGGA-3'      | 5'-GCTTGACGTGTGGCTTGTTTC-3'     |
